# Supplementary material for: Diversity and Evolution of pogo and Tc1/mariner Transposons in the Apoidea Genomes
Source: Biology (Basel). 2021 Sep 20;10(9):940. doi: 10.3390/biology10090940 (PMC8472432; doi:10.3390/biology10090940)
Supplement: Supplementary file 1 [file biology-10-00940-s001.zip]

Archive with 7 entries (7 files):
- Figure S1-S2.pdf
- Table S1 Genome assembly information for all species.xlsx
- Table S2 The access number of reference pogo and Tc1mariner elements.xlsx
- Table S3 EF1-a Hsc70-4  tub3 and Ribosomal protein Accession Number.xlsx
- Table S4 Taxonomic distribution of Apoidea.xlsx
- Table S5 distance of TEs, EF1-a, Hsc70-4,  Tub3, 29 Ribosomal proteins and Divergence time.xls
- Table S6 Significance analysis data.xlsx
