# Supplementary material for: Diversity and Evolution of pogo and Tc1/mariner Transposons in the Apoidea Genomes
Source: Biology (Basel). 2021 Sep 20;10(9):940. doi: 10.3390/biology10090940 (PMC8472432; doi:10.3390/biology10090940)
Supplement: Supplementary file 1 [file biology-10-00940-s001.zip › Table S1 Genome assembly information for all species.xlsx]

## Sheet: eukaryotes
#Organism Name	Organism Groups	BioSample	BioProject	Assembly	Level	Size(Mb)	GC%	WGS	Scaffolds	contigs	N50	Release Date
Apis cerana	Eukaryota;Animals;Insects	SAMN02592885	PRJNA324433	GCA_001442555.1	Scaffold	228.332	34.8987	JANR01	2431	10707	43751	2015-11-12T00:00:00Z
Apis cerana cerana	Eukaryota;Animals;Insects	SAMN02666016	PRJNA239323	GCA_002290385.1	Scaffold	228.791	34.4	JPYL01	879	21784	21160	2017-09-12T00:00:00Z
Apis cerana japonica	Eukaryota;Animals;Insects	SAMD00082726	PRJDB5799	GCA_002217905.1	Scaffold	211.201	33	BDUG01	3315	3344	179487	2017-07-08T00:00:00Z
Apis dorsata	Eukaryota;Animals;Insects	SAMN02954476	PRJNA232132	GCA_000469605.1	Scaffold	230.34	32.5	AUPE01	4040	45204	8422	2013-09-09T00:00:00Z
Apis florea	Eukaryota;Animals;Insects	SAMN00009081	PRJNA45871	GCA_000184785.2	Scaffold	229.015	34.8984	AEKZ01	6984	18379	24915	2010-12-10T00:00:00Z
Apis laboriosa	Eukaryota;Animals;Insects	SAMN15599769	PRJNA647849	GCA_014066325.1	Scaffold	226.063	32.2	JACEOM01	4376	5929	303790	2020-08-05T00:00:00Z
Apis mellifera	Eukaryota;Animals;Insects	SAMN00002455	PRJNA10625	GCA_000002195.1	Chromosome	250.287	33.9024	AADG06	5645	16502	45688	2003-12-19T00:00:00Z
Apis mellifera carnica	Eukaryota;Animals;Insects	SAMN15487569	PRJNA644991	GCA_013841245.1	Scaffold	226.044	32.5	JACDQX01	169	313	2692667	2020-07-28T00:00:00Z
Apis mellifera caucasica	Eukaryota;Animals;Insects	SAMN15487696	PRJNA645012	GCA_013841205.1	Contig	224.767	32.5	JACDQY01	224	224	3303520	2020-07-28T00:00:00Z
Apis mellifera intermissa	Eukaryota;Animals;Insects	SAMN02437452	PRJNA230767	GCA_000819425.1	Scaffold	243.567	31.9	JSUV01	522763	528788	504	2015-01-15T00:00:00Z
Apis mellifera mellifera	Eukaryota;Animals;Insects	SAMN08947224	PRJNA450801	GCA_003314205.1	Chromosome	227.036	32.4519	QFDB01	114	199	5131172	2018-06-18T00:00:00Z
Bombus bifarius	Eukaryota;Animals;Insects	SAMN13353518	PRJNA623924	GCA_011952205.1	Scaffold	266.785	38	JAAQOX01	1249	1251	2202782	2020-04-03T00:00:00Z
Bombus impatiens	Eukaryota;Animals;Insects	SAMN02953787	PRJNA61101	GCA_000188095.4	Scaffold	246.856	37.9	AEQM02	5460	16060	59072	2011-01-31T00:00:00Z
Bombus terrestris	Eukaryota;Animals;Insects	SAMN00009041	PRJNA45869	GCA_000214255.1	Chromosome	248.654	38.0986	AELG01	5678	10672	76043	2010-12-10T00:00:00Z
Bombus vancouverensis nearcticus	Eukaryota;Animals;Insects	SAMN14341632	PRJNA623917	GCA_011952275.1	Scaffold	282.134	38	JAAQRE01	1162	1164	3064919	2020-04-03T00:00:00Z
Bombus vosnesenskii	Eukaryota;Animals;Insects	SAMN14404301	PRJNA623919	GCA_011952255.1	Scaffold	275.578	37.9	JAAQVK01	1429	1447	2733020	2020-04-03T00:00:00Z
Ceratina australensis	Eukaryota;Animals;Insects	SAMN07634805	PRJNA302037	GCA_004307685.1	Scaffold	219.302	33.2	SHCU01	20498	44339	12363	2019-02-27T00:00:00Z
Ceratina calcarata	Eukaryota;Animals;Insects	SAMN04252592	PRJNA340002	GCA_001652005.1	Scaffold	199.937	41.8	LSNX01	50568	65646	23399	2016-05-25T00:00:00Z
Colletes gigas	Eukaryota;Animals;Insects	SAMN13678811	PRJNA597580	GCA_013123115.1	Scaffold	273.057	39.7	WUUM01	326	329	6455398	2020-05-19T00:00:00Z
Dufourea novaeangliae	Eukaryota;Animals;Insects	SAMN03837760	PRJNA311229	GCA_001272555.1	Scaffold	279.506	39.6	LGHO01	4178	7790	191865	2015-08-20T00:00:00Z
Eufriesea mexicana	Eukaryota;Animals;Insects	SAMN03801430	PRJNA339561	GCA_001483705.1	Scaffold	596.278	41.2	LLKC01	187611	212650	38936	2015-12-29T00:00:00Z
Euglossa dilemma	Eukaryota;Animals;Insects	SAMN07177610	PRJNA388474	GCA_002201625.1	Scaffold	588.2	28.8	NIJG01	22698	110426	12398	2017-06-20T00:00:00Z
Frieseomelitta varia	Eukaryota;Animals;Insects	SAMN11115949	PRJNA528016	GCA_011392965.1	Scaffold	275.436	36.4987	WNWW01	2174	6730	98566	2020-03-17T00:00:00Z
Habropoda laboriosa	Eukaryota;Animals;Insects	SAMN03462987	PRJNA339959	GCA_001263275.1	Scaffold	296.955	39.6	LHQN01	27566	50205	22370	2015-08-07T00:00:00Z
Lasioglossum albipes	Eukaryota;Animals;Insects		PRJNA174755	GCA_000346575.1	Scaffold	336.521	42.1	ANOB01	12599	43457	16944	2013-03-13T00:00:00Z
Lepidotrigona ventralis hoosana	Eukaryota;Animals;Insects	SAMN07166495	PRJNA387986	GCA_002806875.1	Scaffold	333.081	36.3	NIPQ01	123317	127582	6124	2017-12-04T00:00:00Z
Megachile rotundata	Eukaryota;Animals;Insects	SAMN02953795	PRJNA66515	GCA_000220905.1	Scaffold	272.661	36.8	AFJA01	6266	16706	64153	2011-07-15T00:00:00Z
Megalopta genalis	Eukaryota;Animals;Insects	SAMN10185932	PRJNA625282	GCA_011865705.1	Scaffold	390.114	40.9	REGU01	14059	42387	30643	2020-04-01T00:00:00Z
Melipona quadrifasciata	Eukaryota;Animals;Insects	SAMN03837634	PRJNA279820	GCA_001276565.1	Scaffold	256.303	39	LIRP01	2866	38604	12520	2015-08-31T00:00:00Z
Nomia melanderi	Eukaryota;Animals;Insects	SAMN10185933	PRJNA598198	GCA_003710045.1	Scaffold	325.881	40.9	REGV01	95883	109762	28892	2018-11-02T00:00:00Z
Osmia lignaria	Eukaryota;Animals;Insects	SAMN14365276	PRJNA631044	GCA_012274295.1	Contig	177.072	39	JAAOZW01	147	147	5475884	2020-04-13T00:00:00Z
Tetragonula carbonaria	Eukaryota;Animals;Insects	SAMN13088838	PRJNA578948	GCA_010645115.1	Contig	299.55	37.5	WIUU01	90201	90201	13590	2020-02-14T00:00:00Z
Tetragonula clypearis	Eukaryota;Animals;Insects	SAMN13088836	PRJNA578946	GCA_010645135.1	Contig	294.05	38	WIUT01	77144	77144	14852	2020-02-14T00:00:00Z
Tetragonula davenporti	Eukaryota;Animals;Insects	SAMN13089823	PRJNA578998	GCA_010645165.1	Contig	284.611	37.3	WIUW01	47286	47286	18510	2020-02-14T00:00:00Z
Tetragonula hockingsi	Eukaryota;Animals;Insects	SAMN13089661	PRJNA578994	GCA_010645185.1	Contig	307.102	37.7	WIUV01	112753	112753	10501	2020-02-14T00:00:00Z
Tetragonula mellipes	Eukaryota;Animals;Insects	SAMN13107058	PRJNA579239	GCA_011634955.1	Contig	554.876	36.7	WINF01	453557	453557	3503	2020-03-23T00:00:00Z
