# Supplementary material for: Diversity and Evolution of pogo and Tc1/mariner Transposons in the Apoidea Genomes
Source: Biology (Basel). 2021 Sep 20;10(9):940. doi: 10.3390/biology10090940 (PMC8472432; doi:10.3390/biology10090940)
Supplement: Supplementary file 1 [file biology-10-00940-s001.zip › Table S3 EF1-a Hsc70-4 tub3 and Ribosomal protein Accession Number.xlsx]

## Sheet: Sheet1
	Accession numbers
Species	EF1-a	Hsc70-4	tub3	RPL3
Apis mellifera	AADG06005527.1	NC_037638.1	AADG06004955.1	XM_624818.6
Apis mellifera carnica	JACDQX010000006.1	JACDQX010000001.1	JACDQX010000008.1	JACDQX010000013.1
Apis mellifera caucasica	JACDQY010000086.1	JACDQY010000014.1	JACDQY010000127.1	JACDQY010000222.1
Apis mellifera mellifera	QFDB01000005.1	QFDB01000001.1	QFDB01000004.1	QFDB01000014.1
Bombus bifarius	JAAQOX010000077.1	JAAQOX010000218.1	JAAQOX010000100.1	XM_033464819.1
Bombus impatiens	AEQM02008676.1	AEQM02001076.1	AEQM02003956.1	XM_003493844.4
Bombus terrestris	AELG01005016.1	AELG01002684.1	AELG01003671.1	XM_003400646.3
Bombus vancouverensis nearcticus	JAAQRE010000026.1	JAAQRE010000010.1	JAAQRE010000107.1	XM_033330840.1
Bombus vosnesenskii	JAAQVK010000116.1	JAAQVK010000086.1	JAAQVK010000025.1	XM_033510635.1
Dufourea novaeangliae	LGHO01000577.1	LGHO01000232.1	LGHO01001542.1	XM_015578577.1
Eufriesea mexicana	LLKC01007097.1	LLKC01008991.1	LLKC01008725.1	XM_017905131.1
Lasioglossum albipes	ANOB01027197.1	ANOB01012439.1	ANOB01008704.1	ANOB01010954.1
Lepidotrigona ventralis hoosana	NIPQ01093128.1	NIPQ01091716.1	NIPQ01120207.1	NIPQ01090805.1
Melipona quadrifasciata	LIRP01006151.1	LIRP01015598.1	LIRP01024053.1	KQ435689.1
Osmia bicornis bicornis	MPJT01000079.1	MPJT01000686.1	MPJT01000039.1	XM_029181730.1
Osmia lignaria	JAAOZW010000042.1	JAAOZW010000107.1	JAAOZW010000055.1	XM_034335861.1
Tetragonula carbonaria	WIUU01008880.1	WIUU01003129.1	WIUU01001254.1	WIUU01012074.1
Tetragonula clypearis	WIUT01002255.1	WIUT01006272.1	WIUT01010113.1	WIUT01007693.1
Tetragonula davenporti	WIUW01008704.1	WIUW01004644.1	WIUW01001253.1	WIUW01001477.1
Tetragonula hockingsi	WIUV01008248.1	WIUV01002498.1	WIUV01000209.1	WIUV01005824.1
Tetragonula mellipes	WINF01009479.1	WINE01004263.1	WINF01011570.1	WINF01001639.1
Accession numbers
Species	RPL1	RPL2	RPL3	RPL4	RPL5	RPL6	RPL10	RPL11	RPL13	RPL14	RPL16	RPL18	RPL22	RPL23	RPL24	RPS2	RPS4	RPS5	RPS7	RPS8	RPS9	RPS10	RPS11	RPS12	RPS13	RPS14	RPS15	RPS17	RPS19
Dufourea novaeangliae	LGHO01002092.1	LGHO01000361.1	XM_015578577.1	XM_015583851.1	XM_015573836.1	LGHO01001241.1	KQ434809.1	KQ434847.1	XM_015578708.1	XM_015581655.1	LGHO01002003.1	XM_015584891.1	LGHO01000542.1	XM_015583451.1	XM_015583169.1	KQ434857.1	XM_015582150.1	XM_015584323.1	KQ434938.1	XM_015580712.1	KQ434796.1	KQ435119.1	KQ434809.1	KQ435026.1	XM_015584312.1	LGHO01000103.1	KQ435207.1	XM_015585016.1	XM_015583103.1
Eufriesea mexicana	LLKC01012684.1	LLKC01010523.1	XM_017905131.1	XM_017902574.1	XM_017901787.1	LLKC01019801.1	XM_017900128.1	XM_017907625.1	XM_017903844.1	KQ759767.1	LLKC01004321.1	KQ763877.1	LLKC01011986.1	XM_017907704.1	XM_017897954.1	XM_017906149.1	XM_017911882.1	XM_017908393.1	XM_017906992.1	KQ761633.1	KQ760512.1	KQ760399.1	XM_017903226.1	XM_017896973.1	XM_017900147.1	LLKC01001926.1	XM_017907568.1	XM_017905344.1	LLKC01009827.1
Osmia lignaria	JAAOZW010000022.1	JAAOZW010000014.1	XM_034335861.1	XM_034323639.1	XM_034326781.1	JAAOZW010000084.1	XM_034336972.1	JAAOZW010000107.1	XM_034335599.1	JAAOZW010000004.1	JAAOZW010000142.1	XM_034315614.1	JAAOZW010000137.1	XM_034336181.1	XM_034335037.1	XM_034338214.1	XM_034330195.1	JAAOZW010000042.1	XM_034330949.1	XM_017901381.1	XM_034324773.1	XM_034330203.1	XM_034321255.	XM_034340277.	XM_034337115.1	JAAOZW010000049.1	XM_034336630.1	XM_034319970.1	JAAOZW010000014.1
Tetragonula clypearis	WIUT01001282.1	WIUT01002807.1	WIUT01007693.1	WIUT01002106.1	WIUT01004634.1	WIUT01003877.1	WIUT01005220.1	WIUT01001426.1	WIUT01003774.1	WIUT01007818.1	WIUT01016805.1	WIUT01011390.1	WIUT01001408.1	WIUT01002958.1	WIUT01005464.1	WIUT01000762.1	WIUT01004307.1	WIUT01010640.1	WIUT01008644.1	WIUT01000239.1	WIUT01002997.1	WIUT01000799.1	WIUT01004754.1	WIUT01007146.1	WIUT01004392.1	WIUT01002207.1	WIUT01003010.1	WIUT01003440.1	WIUT01019811.1
