# Supplementary material for: Diversity and Evolution of pogo and Tc1/mariner Transposons in the Apoidea Genomes
Source: Biology (Basel). 2021 Sep 20;10(9):940. doi: 10.3390/biology10090940 (PMC8472432; doi:10.3390/biology10090940)
Supplement: Supplementary file 1 [file biology-10-00940-s001.zip › Table S5 distance of TEs, EF1-a, Hsc70-4, Tub3, 29 Ribosomal proteins and Divergence time.xls]

## Sheet: EF1A,HSC70-4,TUB3 and RPL3
DD29-30D		Genetic distance
Species 1	Species 2	TEs	EF1a	Hsc70-4	Tub3	RPL3	Divergence time(MYA)
Dufourea novaeangliae	Osmia lignaria	0.00350717	0.154255	0.155905	0.145017	0.168291	110
Dufourea novaeangliae	Eufriesea mexicana	0.0435333	0.137774	0.175327	0.255976	0.203412	110
Eufriesea mexicana	Osmia lignaria	0.0466824	0.163764	0.170101	0.2488	0.179884	110
Eufriesea mexicana	Tetragonula clypearis	0.128667	0.11691	0.145074	0.271365	0.168479	78.8
Osmia lignaria	Tetragonula clypearis	0.132848	0.152148	0.164254	0.153657	0.1774	110
Dufourea novaeangliae	Tetragonula clypearis	0.13357	0.144298	0.173859	0.156506	0.17882	110
DD33D		Genetic distance
Species 1	Species 2	TEs	EF1a	Hsc70-4	Tub3	RPL3	Divergence time(MYA)
Lepidotrigona ventralis hoosana	Tetragonula hockingsi	0.00964691	0.0282712	0.0159162	0.0179866	0.0324722	49
Lepidotrigona ventralis hoosana	Tetragonula carbonaria	0.0100931	0.0282712	0.0152468	0.0170628	0.0316011	49
Lepidotrigona ventralis hoosana	Tetragonula mellipes	0.0100931	0.0317398	0.0145856	0.0170628	0.031607	49
Lepidotrigona ventralis hoosana	Tetragonula davenporti	0.0101009	0.0282712	0.0145779	0.0170628	0.0298499	49
Lepidotrigona ventralis hoosana	Tetragonula clypearis	0.0110034	0.0406112	0.0268778	0.0198065	0.0421734	49
Lepidotrigona ventralis hoosana	Melipona quadrifasciata	0.0252527	0.047579	0.0414422	0.0462122	0.0476891	78
Melipona quadrifasciata	Tetragonula hockingsi	0.0273078	0.0492695	0.0419921	0.0433673	0.0578104	78
Melipona quadrifasciata	Tetragonula carbonaria	0.0277941	0.0492695	0.0419921	0.0423816	0.0569038	78
Melipona quadrifasciata	Tetragonula mellipes	0.0277941	0.0529098	0.0407467	0.0423816	0.0569151	78
Melipona quadrifasciata	Tetragonula davenporti	0.0278183	0.0492695	0.0407264	0.0423816	0.0550711	78
Melipona quadrifasciata	Tetragonula clypearis	0.0283127	0.0568761	0.05128	0.0433407	0.0679166	78
DD34D-cluster1		Genetic distance
Species 1	Species 2	TEs	EF1a	Hsc70-4	Tub3	RPL3	Divergence time(MYA)
Bombus bifarius	Lasioglossum albipes	0.0434406	0.0594328	0.119703	0.188419	0.18748	110
Bombus vosnesenskii	Lasioglossum albipes	0.0441235	0.0612688	0.119734	0.188419	0.187639	110
Bombus vancouverensis nearcticus	Lasioglossum albipes	0.0460441	0.0602488	0.119703	0.188419	0.186262	ND
Lasioglossum albipes	Osmia lignaria	0.0478704	0.0517166	0.110291	0.179114	0.169823	110
Bombus impatiens	Lasioglossum albipes	0.0496718	0.0594328	0.120107	0.191492	0.187438	110
Bombus bifarius	Osmia lignaria	0.0528309	0.0534761	0.0907558	0.163651	0.169187	110
Bombus vosnesenskii	Osmia lignaria	0.053547	0.0552018	0.0907326	0.163651	0.169326	110
Bombus vancouverensis nearcticus	Osmia lignaria	0.0548924	0.0542518	0.0907558	0.163651	0.167032	ND
Bombus terrestris	Lasioglossum albipes	0.0589595	0.0633454	0.124122	0.183844	0.19387	110
Bombus impatiens	Osmia lignaria	0.0593966	0.0534761	0.0921191	0.166452	0.167205	110
Bombus terrestris	Osmia lignaria	0.0717639	0.0550463	0.0952227	0.170683	0.163281	110
DD34D-cluster2		Genetic distance
Species 1	Species 2	TEs	EF1a	Hsc70-4	Tub3	RPL3	Divergence time(MYA)
Apis mellifera carnica	Osmia bicornis bicornis	0.158359	0.174184	0.268882	0.179623	0.170891	110
Apis mellifera caucasica	Osmia bicornis bicornis	0.158359	0.17662	0.260674	0.17822	0.171369	110
Apis mellifera mellifera	Osmia bicornis bicornis	0.158359	0.174184	0.262882	0.173796	0.170891	110
Apis mellifera	Osmia bicornis bicornis	0.179454	0.174184	0.260674	0.17822	0.171369	110
Note：Million years ago(MYA)

## Sheet: 29 Ribosomal proteins
DD29-30D/Tigger		Genetic distance
Species 1	Species 2	TEs	EF1a	Hsc70-4	Tub3	RPL1	RPL2	RPL3	RPL4	RPL5	RPL6	RPL10	RPL11	RPL13	RPL14	RPL16	RPL18	RPL22	RPL23	RPL24	RPS2	RPS4	RPS5	RPS7	RPS8	RPS9	RPS10	RPS11	RPS12	RPS13	RPS14	RPS15	RPS17	RPS19
Dufourea novaeangliae	Osmia lignaria	0.00350717	0.154	0.156	0.145	0.390965	0.0892692	0.167603	0.223737	0.20525	0.274446	0.167237	0.316619	0.19661	0.248412	0.332062	0.159054	0.199731	0.134504	0.141984	0.228981	0.242244	0.198966	0.16316	0.173031	0.143021	0.14802	0.186964	0.147805	0.19727	0.305739	0.155729	0.140497	0.222842
Dufourea novaeangliae	Eufriesea mexicana	0.0435333	0.138	0.175	0.256	0.296655	0.0988003	0.201346	0.232194	0.235081	0.341513	0.156738	0.132417	0.192654	0.227392	0.268334	0.138931	0.395562	0.10621	0.158709	0.211504	0.270499	0.142316	0.153944	0.185878	0.156454	0.13657	0.142358	0.192853	0.183111	0.31608	0.146852	0.134404	0.153578
Eufriesea mexicana	Osmia lignaria	0.0466824	0.164	0.17	0.249	0.12272	0.0968409	0.178079	0.204283	0.179715	0.275047	0.14355	0.294532	0.182464	0.256557	0.24222	0.137874	0.392018	0.0833152	0.155451	0.162578	0.14256	0.168926	0.117174	0.00361318	0.154795	0.131283	0.169007	0.179746	0.150779	0.298021	0.11913	0.119839	0.215959
Eufriesea mexicana	Tetragonula clypearis	0.128667	0.117	0.145	0.271	0.127352	0.115668	0.166833	0.184139	0.15012	0.33416	0.130609	0.101812	0.150302	0.176968	0.194352	0.146831	0.407358	0.105738	0.155831	0.190825	0.121139	0.123748	0.31499	0.124326	0.125199	0.178627	0.12474	0.149827	0.157937	0.225011	0.464156	0.322054	0.256573
Osmia lignaria	Tetragonula clypearis	0.132848	0.152	0.164	0.154	0.125612	0.12284	0.176693	0.238587	0.179773	0.253265	0.182975	0.318091	0.207852	0.248781	0.269506	0.103196	0.223767	0.129323	0.207828	0.231159	0.144558	0.188517	0.361402	0.114905	0.151968	0.19936	0.172333	0.173772	0.157608	0.292922	0.438856	0.319366	0.205476
Dufourea novaeangliae	Tetragonula clypearis	0.13357	0.144	0.174	0.157	0.236242	0.140551	0.178065	0.262285	0.232244	0.36393	0.157216	0.120705	0.187956	0.204242	0.30164	0.159358	0.243899	0.148708	0.204708	0.225775	0.274247	0.169974	0.38617	0.212836	0.172225	0.220615	0.152448	0.126937	0.241259	0.308692	0.534397	0.336185	0.275937
