# Supplementary material for: Diversity and Evolution of pogo and Tc1/mariner Transposons in the Apoidea Genomes
Source: Biology (Basel). 2021 Sep 20;10(9):940. doi: 10.3390/biology10090940 (PMC8472432; doi:10.3390/biology10090940)
Supplement: Supplementary file 1 [file biology-10-00940-s001.zip › Table S6 Significance analysis data.xlsx]

## Sheet: Sheet2
(I) Group			mean value-different value	Standard Error of Mean	Significance	95% confidence interval
						Lower limit	Upper limit
LSD	1	2	-0.063	0.0362359	0.0839694	-0.134546	0.00854587
		3	-.082167*	0.0362359	0.0246544	-0.153713	-0.0106208
		4	-.123500*	0.0362359	0.000821711	-0.195046	-0.0519541
		5	-.134833*	0.0362359	0.000271791	-0.206379	-0.0632875
		6	-0.029	0.0362359	0.424682	-0.100546	0.0425459
		7	-.096333*	0.0362359	0.00862153	-0.167879	-0.0247875
		8	-.142333*	0.0362359	0.000125695	-0.213879	-0.0707875
		9	-.115167*	0.0362359	0.0017694	-0.186713	-0.0436208
		10	-.225167*	0.0362359	4.06563e-09	-0.296713	-0.153621
		11	-.074667*	0.0362359	0.0409138	-0.146213	-0.0031208
		12	-.132333*	0.0362359	0.000349061	-0.203879	-0.0607875
		13	-.104500*	0.0362359	0.00445227	-0.176046	-0.0329541
		14	-.145167*	0.0362359	9.31885e-05	-0.216713	-0.0736208
		15	-.186167*	0.0362359	7.77826e-07	-0.257713	-0.114621
		16	-0.059	0.0362359	0.105387	-0.130546	0.0125459
		17	-.228667*	0.0362359	2.46476e-09	-0.300213	-0.157121
		18	-0.0361667	0.0362359	0.319698	-0.107713	0.0353792
		19	-.089000*	0.0362359	0.0150807	-0.160546	-0.0174541
		20	-.126833*	0.0362359	0.00059793	-0.198379	-0.0552875
		21	-.117333*	0.0362359	0.00145509	-0.188879	-0.0457875
		22	-.083667*	0.0362359	0.0221869	-0.155213	-0.0121208
		23	-.167500*	0.0362359	7.61338e-06	-0.239046	-0.0959541
		24	-0.054	0.0362359	0.138072	-0.125546	0.0175459
		25	-0.0686667	0.0362359	0.0598429	-0.140213	0.0028792
		26	-.087333*	0.0362359	0.0170463	-0.158879	-0.0157875
		27	-.076000*	0.0362359	0.0374854	-0.147546	-0.00445413
		28	-.080167*	0.0362359	0.0283154	-0.151713	-0.0086208
		29	-.099500*	0.0362359	0.00670438	-0.171046	-0.0279541
		30	-.209333*	0.0362359	3.69511e-08	-0.280879	-0.137787
		31	-.228000*	0.0362359	2.7122e-09	-0.299546	-0.156454
		32	-.146667*	0.0362359	7.93979e-05	-0.218213	-0.0751208
		33	-.140000*	0.0362359	0.000160301	-0.211546	-0.0684541
	2	1	0.063	0.0362359	0.0839694	-0.00854587	0.134546
		3	-0.0191667	0.0362359	0.597557	-0.0907125	0.0523792
		4	-0.0605	0.0362359	0.0968919	-0.132046	0.0110459
		5	-.071833*	0.0362359	0.0490971	-0.143379	-0.000287465
		6	0.034	0.0362359	0.349464	-0.0375459	0.105546
		7	-0.0333333	0.0362359	0.358969	-0.104879	0.0382125
		8	-.079333*	0.0362359	0.0299752	-0.150879	-0.00778747
		9	-0.0521667	0.0362359	0.151864	-0.123713	0.0193792
		10	-.162167*	0.0362359	1.41685e-05	-0.233713	-0.0906208
		11	-0.0116667	0.0362359	0.747887	-0.0832125	0.0598792
		12	-0.0693333	0.0362359	0.0574301	-0.140879	0.00221253
		13	-0.0415	0.0362359	0.253755	-0.113046	0.0300459
		14	-.082167*	0.0362359	0.0246544	-0.153713	-0.0106208
		15	-.123167*	0.0362359	0.00084796	-0.194713	-0.0516208
		16	0.004	0.0362359	0.912236	-0.0675459	0.0755459
		17	-.165667*	0.0362359	9.44038e-06	-0.237213	-0.0941208
		18	0.0268333	0.0362359	0.460039	-0.0447125	0.0983792
		19	-0.026	0.0362359	0.474068	-0.0975459	0.0455459
		20	-0.0638333	0.0362359	0.0799884	-0.135379	0.00771253
		21	-0.0543333	0.0362359	0.135672	-0.125879	0.0172125
		22	-0.0206667	0.0362359	0.569225	-0.0922125	0.0508792
		23	-.104500*	0.0362359	0.00445227	-0.176046	-0.0329541
		24	0.009	0.0362359	0.804155	-0.0625459	0.0805459
		25	-0.00566667	0.0362359	0.875923	-0.0772125	0.0658792
		26	-0.0243333	0.0362359	0.502825	-0.0958792	0.0472125
		27	-0.013	0.0362359	0.720233	-0.0845459	0.0585459
		28	-0.0171667	0.0362359	0.636306	-0.0887125	0.0543792
		29	-0.0365	0.0362359	0.315271	-0.108046	0.0350459
		30	-.146333*	0.0362359	8.2283e-05	-0.217879	-0.0747875
		31	-.165000*	0.0362359	1.02042e-05	-0.236546	-0.0934541
		32	-.083667*	0.0362359	0.0221869	-0.155213	-0.0121208
		33	-.077000*	0.0362359	0.0350788	-0.148546	-0.00545413
	3	1	.082167*	0.0362359	0.0246544	0.0106208	0.153713
		2	0.0191667	0.0362359	0.597557	-0.0523792	0.0907125
		4	-0.0413333	0.0362359	0.255659	-0.112879	0.0302125
		5	-0.0526667	0.0362359	0.148002	-0.124213	0.0188792
		6	0.0531667	0.0362359	0.144215	-0.0183792	0.124713
		7	-0.0141667	0.0362359	0.696334	-0.0857125	0.0573792
		8	-0.0601667	0.0362359	0.0987302	-0.131713	0.0113792
		9	-0.033	0.0362359	0.363783	-0.104546	0.0385459
		10	-.143000*	0.0362359	0.000117195	-0.214546	-0.0714541
		11	0.0075	0.0362359	0.836283	-0.0640459	0.0790459
		12	-0.0501667	0.0362359	0.168092	-0.121713	0.0213792
		13	-0.0223333	0.0362359	0.538525	-0.0938792	0.0492125
		14	-0.063	0.0362359	0.0839694	-0.134546	0.00854587
		15	-.104000*	0.0362359	0.00464142	-0.175546	-0.0324541
		16	0.0231667	0.0362359	0.523496	-0.0483792	0.0947125
		17	-.146500*	0.0362359	8.08282e-05	-0.218046	-0.0749541
		18	0.046	0.0362359	0.206065	-0.0255459	0.117546
		19	-0.00683333	0.0362359	0.850655	-0.0783792	0.0647125
		20	-0.0446667	0.0362359	0.219455	-0.116213	0.0268792
		21	-0.0351667	0.0362359	0.333222	-0.106713	0.0363792
		22	-0.0015	0.0362359	0.967031	-0.0730459	0.0700459
		23	-.085333*	0.0362359	0.019702	-0.156879	-0.0137875
		24	0.0281667	0.0362359	0.438087	-0.0433792	0.0997125
		25	0.0135	0.0362359	0.709955	-0.0580459	0.0850459
		26	-0.00516667	0.0362359	0.886793	-0.0767125	0.0663792
		27	0.00616667	0.0362359	0.865076	-0.0653792	0.0777125
		28	0.002	0.0362359	0.956051	-0.0695459	0.0735459
		29	-0.0173333	0.0362359	0.633037	-0.0888792	0.0542125
		30	-.127167*	0.0362359	0.00057902	-0.198713	-0.0556208
		31	-.145833*	0.0362359	8.67988e-05	-0.217379	-0.0742875
		32	-0.0645	0.0362359	0.0769162	-0.136046	0.00704587
		33	-0.0578333	0.0362359	0.112397	-0.129379	0.0137125
	4	1	.123500*	0.0362359	0.000821711	0.0519541	0.195046
		2	0.0605	0.0362359	0.0968919	-0.0110459	0.132046
		3	0.0413333	0.0362359	0.255659	-0.0302125	0.112879
		5	-0.0113333	0.0362359	0.754854	-0.0828792	0.0602125
		6	.094500*	0.0362359	0.00994536	0.0229541	0.166046
		7	0.0271667	0.0362359	0.454493	-0.0443792	0.0987125
		8	-0.0188333	0.0362359	0.60394	-0.0903792	0.0527125
		9	0.00833333	0.0362359	0.818397	-0.0632125	0.0798792
		10	-.101667*	0.0362359	0.00562495	-0.173213	-0.0301208
		11	0.0488333	0.0362359	0.179619	-0.0227125	0.120379
		12	-0.00883333	0.0362359	0.80771	-0.0803792	0.0627125
		13	0.019	0.0362359	0.600745	-0.0525459	0.0905459
		14	-0.0216667	0.0362359	0.550704	-0.0932125	0.0498792
		15	-0.0626667	0.0362359	0.0856065	-0.134213	0.0088792
		16	0.0645	0.0362359	0.0769162	-0.00704587	0.136046
		17	-.105167*	0.0362359	0.00421103	-0.176713	-0.0336208
		18	.087333*	0.0362359	0.0170463	0.0157875	0.158879
		19	0.0345	0.0362359	0.342442	-0.0370459	0.106046
		20	-0.00333333	0.0362359	0.926818	-0.0748792	0.0682125
		21	0.00616667	0.0362359	0.865076	-0.0653792	0.0777125
		22	0.0398333	0.0362359	0.273248	-0.0317125	0.111379
		23	-0.044	0.0362359	0.226382	-0.115546	0.0275459
		24	0.0695	0.0362359	0.0568399	-0.00204587	0.141046
		25	0.0548333	0.0362359	0.132134	-0.0167125	0.126379
		26	0.0361667	0.0362359	0.319698	-0.0353792	0.107713
		27	0.0475	0.0362359	0.191729	-0.0240459	0.119046
		28	0.0433333	0.0362359	0.233464	-0.0282125	0.114879
		29	0.024	0.0362359	0.508686	-0.0475459	0.0955459
		30	-.085833*	0.0362359	0.0190059	-0.157379	-0.0142875
		31	-.104500*	0.0362359	0.00445227	-0.176046	-0.0329541
		32	-0.0231667	0.0362359	0.523496	-0.0947125	0.0483792
		33	-0.0165	0.0362359	0.649457	-0.0880459	0.0550459
	5	1	.134833*	0.0362359	0.000271791	0.0632875	0.206379
		2	.071833*	0.0362359	0.0490971	0.000287465	0.143379
		3	0.0526667	0.0362359	0.148002	-0.0188792	0.124213
		4	0.0113333	0.0362359	0.754854	-0.0602125	0.0828792
		6	.105833*	0.0362359	0.00398181	0.0342875	0.177379
		7	0.0385	0.0362359	0.28957	-0.0330459	0.110046
		8	-0.0075	0.0362359	0.836283	-0.0790459	0.0640459
		9	0.0196667	0.0362359	0.588042	-0.0518792	0.0912125
		10	-.090333*	0.0362359	0.013656	-0.161879	-0.0187875
		11	0.0601667	0.0362359	0.0987302	-0.0113792	0.131713
		12	0.0025	0.0362359	0.945079	-0.0690459	0.0740459
		13	0.0303333	0.0362359	0.403743	-0.0412125	0.101879
		14	-0.0103333	0.0362359	0.775873	-0.0818792	0.0612125
		15	-0.0513333	0.0362359	0.158473	-0.122879	0.0202125
		16	.075833*	0.0362359	0.0379	0.00428747	0.147379
		17	-.093833*	0.0362359	0.0104703	-0.165379	-0.0222875
		18	.098667*	0.0362359	0.00716731	0.0271208	0.170213
		19	0.0458333	0.0362359	0.207705	-0.0257125	0.117379
		20	0.008	0.0362359	0.82554	-0.0635459	0.0795459
		21	0.0175	0.0362359	0.629774	-0.0540459	0.0890459
		22	0.0511667	0.0362359	0.159821	-0.0203792	0.122713
		23	-0.0326667	0.0362359	0.368637	-0.104213	0.0388792
		24	.080833*	0.0362359	0.0270457	0.00928747	0.152379
		25	0.0661667	0.0362359	0.0696585	-0.0053792	0.137713
		26	0.0475	0.0362359	0.191729	-0.0240459	0.119046
		27	0.0588333	0.0362359	0.106366	-0.0127125	0.130379
		28	0.0546667	0.0362359	0.133305	-0.0168792	0.126213
		29	0.0353333	0.0362359	0.330942	-0.0362125	0.106879
		30	-.074500*	0.0362359	0.0413607	-0.146046	-0.00295413
		31	-.093167*	0.0362359	0.01102	-0.164713	-0.0216208
		32	-0.0118333	0.0362359	0.744412	-0.0833792	0.0597125
		33	-0.00516667	0.0362359	0.886793	-0.0767125	0.0663792
	6	1	0.029	0.0362359	0.424682	-0.0425459	0.100546
		2	-0.034	0.0362359	0.349464	-0.105546	0.0375459
		3	-0.0531667	0.0362359	0.144215	-0.124713	0.0183792
		4	-.094500*	0.0362359	0.00994536	-0.166046	-0.0229541
		5	-.105833*	0.0362359	0.00398181	-0.177379	-0.0342875
		7	-0.0673333	0.0362359	0.0649233	-0.138879	0.00421253
		8	-.113333*	0.0362359	0.00208338	-0.184879	-0.0417875
		9	-.086167*	0.0362359	0.0185541	-0.157713	-0.0146208
		10	-.196167*	0.0362359	2.14702e-07	-0.267713	-0.124621
		11	-0.0456667	0.0362359	0.209355	-0.117213	0.0258792
		12	-.103333*	0.0362359	0.00490504	-0.174879	-0.0317875
		13	-.075500*	0.0362359	0.038741	-0.147046	-0.00395413
		14	-.116167*	0.0362359	0.00161723	-0.187713	-0.0446208
		15	-.157167*	0.0362359	2.50388e-05	-0.228713	-0.0856208
		16	-0.03	0.0362359	0.408919	-0.101546	0.0415459
		17	-.199667*	0.0362359	1.35438e-07	-0.271213	-0.128121
		18	-0.00716667	0.0362359	0.843462	-0.0787125	0.0643792
		19	-0.06	0.0362359	0.0996599	-0.131546	0.0115459
		20	-.097833*	0.0362359	0.00765901	-0.169379	-0.0262875
		21	-.088333*	0.0362359	0.0158414	-0.159879	-0.0167875
		22	-0.0546667	0.0362359	0.133305	-0.126213	0.0168792
		23	-.138500*	0.0362359	0.000187137	-0.210046	-0.0669541
		24	-0.025	0.0362359	0.491212	-0.0965459	0.0465459
		25	-0.0396667	0.0362359	0.275253	-0.111213	0.0318792
		26	-0.0583333	0.0362359	0.109349	-0.129879	0.0132125
		27	-0.047	0.0362359	0.196423	-0.118546	0.0245459
		28	-0.0511667	0.0362359	0.159821	-0.122713	0.0203792
		29	-0.0705	0.0362359	0.0534043	-0.142046	0.00104587
		30	-.180333*	0.0362359	1.61455e-06	-0.251879	-0.108787
		31	-.199000*	0.0362359	1.4792e-07	-0.270546	-0.127454
		32	-.117667*	0.0362359	0.00141162	-0.189213	-0.0461208
		33	-.111000*	0.0362359	0.00255757	-0.182546	-0.0394541
	7	1	.096333*	0.0362359	0.00862153	0.0247875	0.167879
		2	0.0333333	0.0362359	0.358969	-0.0382125	0.104879
		3	0.0141667	0.0362359	0.696334	-0.0573792	0.0857125
		4	-0.0271667	0.0362359	0.454493	-0.0987125	0.0443792
		5	-0.0385	0.0362359	0.28957	-0.110046	0.0330459
		6	0.0673333	0.0362359	0.0649233	-0.00421253	0.138879
		8	-0.046	0.0362359	0.206065	-0.117546	0.0255459
		9	-0.0188333	0.0362359	0.60394	-0.0903792	0.0527125
		10	-.128833*	0.0362359	0.000492608	-0.200379	-0.0572875
		11	0.0216667	0.0362359	0.550704	-0.0498792	0.0932125
		12	-0.036	0.0362359	0.321926	-0.107546	0.0355459
		13	-0.00816667	0.0362359	0.821967	-0.0797125	0.0633792
		14	-0.0488333	0.0362359	0.179619	-0.120379	0.0227125
		15	-.089833*	0.0362359	0.0141755	-0.161379	-0.0182875
		16	0.0373333	0.0362359	0.304384	-0.0342125	0.108879
		17	-.132333*	0.0362359	0.000349061	-0.203879	-0.0607875
		18	0.0601667	0.0362359	0.0987302	-0.0113792	0.131713
		19	0.00733333	0.0362359	0.839871	-0.0642125	0.0788792
		20	-0.0305	0.0362359	0.401171	-0.102046	0.0410459
		21	-0.021	0.0362359	0.563018	-0.0925459	0.0505459
		22	0.0126667	0.0362359	0.727114	-0.0588792	0.0842125
		23	-0.0711667	0.0362359	0.0512124	-0.142713	0.000379202
		24	0.0423333	0.0362359	0.244383	-0.0292125	0.113879
		25	0.0276667	0.0362359	0.446247	-0.0438792	0.0992125
		26	0.009	0.0362359	0.804155	-0.0625459	0.0805459
		27	0.0203333	0.0362359	0.575465	-0.0512125	0.0918792
		28	0.0161667	0.0362359	0.656074	-0.0553792	0.0877125
		29	-0.00316667	0.0362359	0.930467	-0.0747125	0.0683792
		30	-.113000*	0.0362359	0.00214573	-0.184546	-0.0414541
		31	-.131667*	0.0362359	0.000372928	-0.203213	-0.0601208
		32	-0.0503333	0.0362359	0.166691	-0.121879	0.0212125
		33	-0.0436667	0.0362359	0.229903	-0.115213	0.0278792
	8	1	.142333*	0.0362359	0.000125695	0.0707875	0.213879
		2	.079333*	0.0362359	0.0299752	0.00778747	0.150879
		3	0.0601667	0.0362359	0.0987302	-0.0113792	0.131713
		4	0.0188333	0.0362359	0.60394	-0.0527125	0.0903792
		5	0.0075	0.0362359	0.836283	-0.0640459	0.0790459
		6	.113333*	0.0362359	0.00208338	0.0417875	0.184879
		7	0.046	0.0362359	0.206065	-0.0255459	0.117546
		9	0.0271667	0.0362359	0.454493	-0.0443792	0.0987125
		10	-.082833*	0.0362359	0.0235296	-0.154379	-0.0112875
		11	0.0676667	0.0362359	0.0636207	-0.0038792	0.139213
		12	0.01	0.0362359	0.782917	-0.0615459	0.0815459
		13	0.0378333	0.0362359	0.297974	-0.0337125	0.109379
		14	-0.00283333	0.0362359	0.937771	-0.0743792	0.0687125
		15	-0.0438333	0.0362359	0.228138	-0.115379	0.0277125
		16	.083333*	0.0362359	0.0227157	0.0117875	0.154879
		17	-.086333*	0.0362359	0.0183317	-0.157879	-0.0147875
		18	.106167*	0.0362359	0.00387154	0.0346208	0.177713
		19	0.0533333	0.0362359	0.14297	-0.0182125	0.124879
		20	0.0155	0.0362359	0.669389	-0.0560459	0.0870459
		21	0.025	0.0362359	0.491212	-0.0465459	0.0965459
		22	0.0586667	0.0362359	0.107353	-0.0128792	0.130213
		23	-0.0251667	0.0362359	0.488331	-0.0967125	0.0463792
		24	.088333*	0.0362359	0.0158414	0.0167875	0.159879
		25	.073667*	0.0362359	0.043658	0.0021208	0.145213
		26	0.055	0.0362359	0.130971	-0.0165459	0.126546
		27	0.0663333	0.0362359	0.068965	-0.00521253	0.137879
		28	0.0621667	0.0362359	0.0881108	-0.0093792	0.133713
		29	0.0428333	0.0362359	0.238879	-0.0287125	0.114379
		30	-0.067	0.0362359	0.066248	-0.138546	0.00454587
		31	-.085667*	0.0362359	0.0192355	-0.157213	-0.0141208
		32	-0.00433333	0.0362359	0.904956	-0.0758792	0.0672125
		33	0.00233333	0.0362359	0.948735	-0.0692125	0.0738792
	9	1	.115167*	0.0362359	0.0017694	0.0436208	0.186713
		2	0.0521667	0.0362359	0.151864	-0.0193792	0.123713
		3	0.033	0.0362359	0.363783	-0.0385459	0.104546
		4	-0.00833333	0.0362359	0.818397	-0.0798792	0.0632125
		5	-0.0196667	0.0362359	0.588042	-0.0912125	0.0518792
		6	.086167*	0.0362359	0.0185541	0.0146208	0.157713
		7	0.0188333	0.0362359	0.60394	-0.0527125	0.0903792
		8	-0.0271667	0.0362359	0.454493	-0.0987125	0.0443792
		10	-.110000*	0.0362359	0.00278979	-0.181546	-0.0384541
		11	0.0405	0.0362359	0.26533	-0.0310459	0.112046
		12	-0.0171667	0.0362359	0.636306	-0.0887125	0.0543792
		13	0.0106667	0.0362359	0.768847	-0.0608792	0.0822125
		14	-0.03	0.0362359	0.408919	-0.101546	0.0415459
		15	-0.071	0.0362359	0.0517531	-0.142546	0.000545868
		16	0.0561667	0.0362359	0.123051	-0.0153792	0.127713
		17	-.113500*	0.0362359	0.00205284	-0.185046	-0.0419541
		18	.079000*	0.0362359	0.0306624	0.00745413	0.150546
		19	0.0261667	0.0362359	0.471243	-0.0453792	0.0977125
		20	-0.0116667	0.0362359	0.747887	-0.0832125	0.0598792
		21	-0.00216667	0.0362359	0.952393	-0.0737125	0.0693792
		22	0.0315	0.0362359	0.385944	-0.0400459	0.103046
		23	-0.0523333	0.0362359	0.150568	-0.123879	0.0192125
		24	0.0611667	0.0362359	0.0932982	-0.0103792	0.132713
		25	0.0465	0.0362359	0.201202	-0.0250459	0.118046
		26	0.0278333	0.0362359	0.443517	-0.0437125	0.0993792
		27	0.0391667	0.0362359	0.281328	-0.0323792	0.110713
		28	0.035	0.0362359	0.335512	-0.0365459	0.106546
		29	0.0156667	0.0362359	0.66605	-0.0558792	0.0872125
		30	-.094167*	0.0362359	0.0102048	-0.165713	-0.0226208
		31	-.112833*	0.0362359	0.00217755	-0.184379	-0.0412875
		32	-0.0315	0.0362359	0.385944	-0.103046	0.0400459
		33	-0.0248333	0.0362359	0.494101	-0.0963792	0.0467125
	10	1	.225167*	0.0362359	4.06563e-09	0.153621	0.296713
		2	.162167*	0.0362359	1.41685e-05	0.0906208	0.233713
		3	.143000*	0.0362359	0.000117195	0.0714541	0.214546
		4	.101667*	0.0362359	0.00562495	0.0301208	0.173213
		5	.090333*	0.0362359	0.013656	0.0187875	0.161879
		6	.196167*	0.0362359	2.14702e-07	0.124621	0.267713
		7	.128833*	0.0362359	0.000492608	0.0572875	0.200379
		8	.082833*	0.0362359	0.0235296	0.0112875	0.154379
		9	.110000*	0.0362359	0.00278979	0.0384541	0.181546
		11	.150500*	0.0362359	5.24469e-05	0.0789541	0.222046
		12	.092833*	0.0362359	0.0113045	0.0212875	0.164379
		13	.120667*	0.0362359	0.00107132	0.0491208	0.192213
		14	.080000*	0.0362359	0.0286409	0.00845413	0.151546
		15	0.039	0.0362359	0.283373	-0.0325459	0.110546
		16	.166167*	0.0362359	8.90398e-06	0.0946208	0.237713
		17	-0.0035	0.0362359	0.92317	-0.0750459	0.0680459
		18	.189000*	0.0362359	5.4253e-07	0.117454	0.260546
		19	.136167*	0.0362359	0.000237503	0.0646208	0.207713
		20	.098333*	0.0362359	0.00736046	0.0267875	0.169879
		21	.107833*	0.0362359	0.00336103	0.0362875	0.179379
		22	.141500*	0.0362359	0.000137147	0.0699541	0.213046
		23	0.0576667	0.0362359	0.113429	-0.0138792	0.129213
		24	.171167*	0.0362359	4.92744e-06	0.0996208	0.242713
		25	.156500*	0.0362359	2.6988e-05	0.0849541	0.228046
		26	.137833*	0.0362359	0.000200385	0.0662875	0.209379
		27	.149167*	0.0362359	6.06373e-05	0.0776208	0.220713
		28	.145000*	0.0362359	9.48546e-05	0.0734541	0.216546
		29	.125667*	0.0362359	0.000668783	0.0541208	0.197213
		30	0.0158333	0.0362359	0.662718	-0.0557125	0.0873792
		31	-0.00283333	0.0362359	0.937771	-0.0743792	0.0687125
		32	.078500*	0.0362359	0.0317187	0.00695413	0.150046
		33	.085167*	0.0362359	0.0199389	0.0136208	0.156713
	11	1	.074667*	0.0362359	0.0409138	0.0031208	0.146213
		2	0.0116667	0.0362359	0.747887	-0.0598792	0.0832125
		3	-0.0075	0.0362359	0.836283	-0.0790459	0.0640459
		4	-0.0488333	0.0362359	0.179619	-0.120379	0.0227125
		5	-0.0601667	0.0362359	0.0987302	-0.131713	0.0113792
		6	0.0456667	0.0362359	0.209355	-0.0258792	0.117213
		7	-0.0216667	0.0362359	0.550704	-0.0932125	0.0498792
		8	-0.0676667	0.0362359	0.0636207	-0.139213	0.0038792
		9	-0.0405	0.0362359	0.26533	-0.112046	0.0310459
		10	-.150500*	0.0362359	5.24469e-05	-0.222046	-0.0789541
		12	-0.0576667	0.0362359	0.113429	-0.129213	0.0138792
		13	-0.0298333	0.0362359	0.411521	-0.101379	0.0417125
		14	-0.0705	0.0362359	0.0534043	-0.142046	0.00104587
		15	-.111500*	0.0362359	0.00244827	-0.183046	-0.0399541
		16	0.0156667	0.0362359	0.66605	-0.0558792	0.0872125
		17	-.154000*	0.0362359	3.56763e-05	-0.225546	-0.0824541
		18	0.0385	0.0362359	0.28957	-0.0330459	0.110046
		19	-0.0143333	0.0362359	0.692944	-0.0858792	0.0572125
		20	-0.0521667	0.0362359	0.151864	-0.123713	0.0193792
		21	-0.0426667	0.0362359	0.240704	-0.114213	0.0288792
		22	-0.009	0.0362359	0.804155	-0.0805459	0.0625459
		23	-.092833*	0.0362359	0.0113045	-0.164379	-0.0212875
		24	0.0206667	0.0362359	0.569225	-0.0508792	0.0922125
		25	0.006	0.0362359	0.868689	-0.0655459	0.0775459
		26	-0.0126667	0.0362359	0.727114	-0.0842125	0.0588792
		27	-0.00133333	0.0362359	0.970692	-0.0728792	0.0702125
		28	-0.0055	0.0362359	0.879543	-0.0770459	0.0660459
		29	-0.0248333	0.0362359	0.494101	-0.0963792	0.0467125
		30	-.134667*	0.0362359	0.000276393	-0.206213	-0.0631208
		31	-.153333*	0.0362359	3.84119e-05	-0.224879	-0.0817875
		32	-.072000*	0.0362359	0.04858	-0.143546	-0.000454132
		33	-0.0653333	0.0362359	0.0732131	-0.136879	0.00621253
	12	1	.132333*	0.0362359	0.000349061	0.0607875	0.203879
		2	0.0693333	0.0362359	0.0574301	-0.00221253	0.140879
		3	0.0501667	0.0362359	0.168092	-0.0213792	0.121713
		4	0.00883333	0.0362359	0.80771	-0.0627125	0.0803792
		5	-0.0025	0.0362359	0.945079	-0.0740459	0.0690459
		6	.103333*	0.0362359	0.00490504	0.0317875	0.174879
		7	0.036	0.0362359	0.321926	-0.0355459	0.107546
		8	-0.01	0.0362359	0.782917	-0.0815459	0.0615459
		9	0.0171667	0.0362359	0.636306	-0.0543792	0.0887125
		10	-.092833*	0.0362359	0.0113045	-0.164379	-0.0212875
		11	0.0576667	0.0362359	0.113429	-0.0138792	0.129213
		13	0.0278333	0.0362359	0.443517	-0.0437125	0.0993792
		14	-0.0128333	0.0362359	0.723671	-0.0843792	0.0587125
		15	-0.0538333	0.0362359	0.139284	-0.125379	0.0177125
		16	.073333*	0.0362359	0.0446069	0.00178747	0.144879
		17	-.096333*	0.0362359	0.00862153	-0.167879	-0.0247875
		18	.096167*	0.0362359	0.00873495	0.0246208	0.167713
		19	0.0433333	0.0362359	0.233464	-0.0282125	0.114879
		20	0.0055	0.0362359	0.879543	-0.0660459	0.0770459
		21	0.015	0.0362359	0.679446	-0.0565459	0.0865459
		22	0.0486667	0.0362359	0.1811	-0.0228792	0.120213
		23	-0.0351667	0.0362359	0.333222	-0.106713	0.0363792
		24	.078333*	0.0362359	0.0320778	0.00678747	0.149879
		25	0.0636667	0.0362359	0.080772	-0.0078792	0.135213
		26	0.045	0.0362359	0.21605	-0.0265459	0.116546
		27	0.0563333	0.0362359	0.121951	-0.0152125	0.127879
		28	0.0521667	0.0362359	0.151864	-0.0193792	0.123713
		29	0.0328333	0.0362359	0.366205	-0.0387125	0.104379
		30	-.077000*	0.0362359	0.0350788	-0.148546	-0.00545413
		31	-.095667*	0.0362359	0.00908333	-0.167213	-0.0241208
		32	-0.0143333	0.0362359	0.692944	-0.0858792	0.0572125
		33	-0.00766667	0.0362359	0.832699	-0.0792125	0.0638792
	13	1	.104500*	0.0362359	0.00445227	0.0329541	0.176046
		2	0.0415	0.0362359	0.253755	-0.0300459	0.113046
		3	0.0223333	0.0362359	0.538525	-0.0492125	0.0938792
		4	-0.019	0.0362359	0.600745	-0.0905459	0.0525459
		5	-0.0303333	0.0362359	0.403743	-0.101879	0.0412125
		6	.075500*	0.0362359	0.038741	0.00395413	0.147046
		7	0.00816667	0.0362359	0.821967	-0.0633792	0.0797125
		8	-0.0378333	0.0362359	0.297974	-0.109379	0.0337125
		9	-0.0106667	0.0362359	0.768847	-0.0822125	0.0608792
		10	-.120667*	0.0362359	0.00107132	-0.192213	-0.0491208
		11	0.0298333	0.0362359	0.411521	-0.0417125	0.101379
		12	-0.0278333	0.0362359	0.443517	-0.0993792	0.0437125
		14	-0.0406667	0.0362359	0.263376	-0.112213	0.0308792
		15	-.081667*	0.0362359	0.0255286	-0.153213	-0.0101208
		16	0.0455	0.0362359	0.211015	-0.0260459	0.117046
		17	-.124167*	0.0362359	0.000771479	-0.195713	-0.0526208
		18	0.0683333	0.0362359	0.0610807	-0.00321253	0.139879
		19	0.0155	0.0362359	0.669389	-0.0560459	0.0870459
		20	-0.0223333	0.0362359	0.538525	-0.0938792	0.0492125
		21	-0.0128333	0.0362359	0.723671	-0.0843792	0.0587125
		22	0.0208333	0.0362359	0.566118	-0.0507125	0.0923792
		23	-0.063	0.0362359	0.0839694	-0.134546	0.00854587
		24	0.0505	0.0362359	0.165299	-0.0210459	0.122046
		25	0.0358333	0.0362359	0.324165	-0.0357125	0.107379
		26	0.0171667	0.0362359	0.636306	-0.0543792	0.0887125
		27	0.0285	0.0362359	0.432696	-0.0430459	0.100046
		28	0.0243333	0.0362359	0.502825	-0.0472125	0.0958792
		29	0.005	0.0362359	0.890421	-0.0665459	0.0765459
		30	-.104833*	0.0362359	0.00433011	-0.176379	-0.0332875
		31	-.123500*	0.0362359	0.000821711	-0.195046	-0.0519541
		32	-0.0421667	0.0362359	0.246238	-0.113713	0.0293792
		33	-0.0355	0.0362359	0.328673	-0.107046	0.0360459
	14	1	.145167*	0.0362359	9.31885e-05	0.0736208	0.216713
		2	.082167*	0.0362359	0.0246544	0.0106208	0.153713
		3	0.063	0.0362359	0.0839694	-0.00854587	0.134546
		4	0.0216667	0.0362359	0.550704	-0.0498792	0.0932125
		5	0.0103333	0.0362359	0.775873	-0.0612125	0.0818792
		6	.116167*	0.0362359	0.00161723	0.0446208	0.187713
		7	0.0488333	0.0362359	0.179619	-0.0227125	0.120379
		8	0.00283333	0.0362359	0.937771	-0.0687125	0.0743792
		9	0.03	0.0362359	0.408919	-0.0415459	0.101546
		10	-.080000*	0.0362359	0.0286409	-0.151546	-0.00845413
		11	0.0705	0.0362359	0.0534043	-0.00104587	0.142046
		12	0.0128333	0.0362359	0.723671	-0.0587125	0.0843792
		13	0.0406667	0.0362359	0.263376	-0.0308792	0.112213
		15	-0.041	0.0362359	0.259498	-0.112546	0.0305459
		16	.086167*	0.0362359	0.0185541	0.0146208	0.157713
		17	-.083500*	0.0362359	0.0224499	-0.155046	-0.0119541
		18	.109000*	0.0362359	0.0030413	0.0374541	0.180546
		19	0.0561667	0.0362359	0.123051	-0.0153792	0.127713
		20	0.0183333	0.0362359	0.613572	-0.0532125	0.0898792
		21	0.0278333	0.0362359	0.443517	-0.0437125	0.0993792
		22	0.0615	0.0362359	0.0915423	-0.0100459	0.133046
		23	-0.0223333	0.0362359	0.538525	-0.0938792	0.0492125
		24	.091167*	0.0362359	0.0128277	0.0196208	0.162713
		25	.076500*	0.0362359	0.0362649	0.00495413	0.148046
		26	0.0578333	0.0362359	0.112397	-0.0137125	0.129379
		27	0.0691667	0.0362359	0.0580255	-0.0023792	0.140713
		28	0.065	0.0362359	0.0746763	-0.00654587	0.136546
		29	0.0456667	0.0362359	0.209355	-0.0258792	0.117213
		30	-0.0641667	0.0362359	0.07844	-0.135713	0.0073792
		31	-.082833*	0.0362359	0.0235296	-0.154379	-0.0112875
		32	-0.0015	0.0362359	0.967031	-0.0730459	0.0700459
		33	0.00516667	0.0362359	0.886793	-0.0663792	0.0767125
	15	1	.186167*	0.0362359	7.77826e-07	0.114621	0.257713
		2	.123167*	0.0362359	0.00084796	0.0516208	0.194713
		3	.104000*	0.0362359	0.00464142	0.0324541	0.175546
		4	0.0626667	0.0362359	0.0856065	-0.0088792	0.134213
		5	0.0513333	0.0362359	0.158473	-0.0202125	0.122879
		6	.157167*	0.0362359	2.50388e-05	0.0856208	0.228713
		7	.089833*	0.0362359	0.0141755	0.0182875	0.161379
		8	0.0438333	0.0362359	0.228138	-0.0277125	0.115379
		9	0.071	0.0362359	0.0517531	-0.000545868	0.142546
		10	-0.039	0.0362359	0.283373	-0.110546	0.0325459
		11	.111500*	0.0362359	0.00244827	0.0399541	0.183046
		12	0.0538333	0.0362359	0.139284	-0.0177125	0.125379
		13	.081667*	0.0362359	0.0255286	0.0101208	0.153213
		14	0.041	0.0362359	0.259498	-0.0305459	0.112546
		16	.127167*	0.0362359	0.00057902	0.0556208	0.198713
		17	-0.0425	0.0362359	0.242539	-0.114046	0.0290459
		18	.150000*	0.0362359	5.53859e-05	0.0784541	0.221546
		19	.097167*	0.0362359	0.00807412	0.0256208	0.168713
		20	0.0593333	0.0362359	0.103449	-0.0122125	0.130879
		21	0.0688333	0.0362359	0.0592319	-0.00271253	0.140379
		22	.102500*	0.0362359	0.00525377	0.0309541	0.174046
		23	0.0186667	0.0362359	0.607143	-0.0528792	0.0902125
		24	.132167*	0.0362359	0.000354889	0.0606208	0.203713
		25	.117500*	0.0362359	0.0014332	0.0459541	0.189046
		26	.098833*	0.0362359	0.00707247	0.0272875	0.170379
		27	.110167*	0.0362359	0.00274978	0.0386208	0.181713
		28	.106000*	0.0362359	0.00392632	0.0344541	0.177546
		29	.086667*	0.0362359	0.017894	0.0151208	0.158213
		30	-0.0231667	0.0362359	0.523496	-0.0947125	0.0483792
		31	-0.0418333	0.0362359	0.249976	-0.113379	0.0297125
		32	0.0395	0.0362359	0.277268	-0.0320459	0.111046
		33	0.0461667	0.0362359	0.204435	-0.0253792	0.117713
	16	1	0.059	0.0362359	0.105387	-0.0125459	0.130546
		2	-0.004	0.0362359	0.912236	-0.0755459	0.0675459
		3	-0.0231667	0.0362359	0.523496	-0.0947125	0.0483792
		4	-0.0645	0.0362359	0.0769162	-0.136046	0.00704587
		5	-.075833*	0.0362359	0.0379	-0.147379	-0.00428747
		6	0.03	0.0362359	0.408919	-0.0415459	0.101546
		7	-0.0373333	0.0362359	0.304384	-0.108879	0.0342125
		8	-.083333*	0.0362359	0.0227157	-0.154879	-0.0117875
		9	-0.0561667	0.0362359	0.123051	-0.127713	0.0153792
		10	-.166167*	0.0362359	8.90398e-06	-0.237713	-0.0946208
		11	-0.0156667	0.0362359	0.66605	-0.0872125	0.0558792
		12	-.073333*	0.0362359	0.0446069	-0.144879	-0.00178747
		13	-0.0455	0.0362359	0.211015	-0.117046	0.0260459
		14	-.086167*	0.0362359	0.0185541	-0.157713	-0.0146208
		15	-.127167*	0.0362359	0.00057902	-0.198713	-0.0556208
		17	-.169667*	0.0362359	5.892e-06	-0.241213	-0.0981208
		18	0.0228333	0.0362359	0.529481	-0.0487125	0.0943792
		19	-0.03	0.0362359	0.408919	-0.101546	0.0415459
		20	-0.0678333	0.0362359	0.0629776	-0.139379	0.00371253
		21	-0.0583333	0.0362359	0.109349	-0.129879	0.0132125
		22	-0.0246667	0.0362359	0.497	-0.0962125	0.0468792
		23	-.108500*	0.0362359	0.00317473	-0.180046	-0.0369541
		24	0.005	0.0362359	0.890421	-0.0665459	0.0765459
		25	-0.00966667	0.0362359	0.789979	-0.0812125	0.0618792
		26	-0.0283333	0.0362359	0.435386	-0.0998792	0.0432125
		27	-0.017	0.0362359	0.639583	-0.0885459	0.0545459
		28	-0.0211667	0.0362359	0.559927	-0.0927125	0.0503792
		29	-0.0405	0.0362359	0.26533	-0.112046	0.0310459
		30	-.150333*	0.0362359	5.34096e-05	-0.221879	-0.0787875
		31	-.169000*	0.0362359	6.37704e-06	-0.240546	-0.0974541
		32	-.087667*	0.0362359	0.0166359	-0.159213	-0.0161208
		33	-.081000*	0.0362359	0.0267362	-0.152546	-0.00945413
	17	1	.228667*	0.0362359	2.46476e-09	0.157121	0.300213
		2	.165667*	0.0362359	9.44038e-06	0.0941208	0.237213
		3	.146500*	0.0362359	8.08282e-05	0.0749541	0.218046
		4	.105167*	0.0362359	0.00421103	0.0336208	0.176713
		5	.093833*	0.0362359	0.0104703	0.0222875	0.165379
		6	.199667*	0.0362359	1.35438e-07	0.128121	0.271213
		7	.132333*	0.0362359	0.000349061	0.0607875	0.203879
		8	.086333*	0.0362359	0.0183317	0.0147875	0.157879
		9	.113500*	0.0362359	0.00205284	0.0419541	0.185046
		10	0.0035	0.0362359	0.92317	-0.0680459	0.0750459
		11	.154000*	0.0362359	3.56763e-05	0.0824541	0.225546
		12	.096333*	0.0362359	0.00862153	0.0247875	0.167879
		13	.124167*	0.0362359	0.000771479	0.0526208	0.195713
		14	.083500*	0.0362359	0.0224499	0.0119541	0.155046
		15	0.0425	0.0362359	0.242539	-0.0290459	0.114046
		16	.169667*	0.0362359	5.892e-06	0.0981208	0.241213
		18	.192500*	0.0362359	3.45958e-07	0.120954	0.264046
		19	.139667*	0.0362359	0.000165929	0.0681208	0.211213
		20	.101833*	0.0362359	0.00554886	0.0302875	0.173379
		21	.111333*	0.0362359	0.00248422	0.0397875	0.182879
		22	.145000*	0.0362359	9.48546e-05	0.0734541	0.216546
		23	0.0611667	0.0362359	0.0932982	-0.0103792	0.132713
		24	.174667*	0.0362359	3.23322e-06	0.103121	0.246213
		25	.160000*	0.0362359	1.81616e-05	0.0884541	0.231546
		26	.141333*	0.0362359	0.000139553	0.0697875	0.212879
		27	.152667*	0.0362359	4.13479e-05	0.0811208	0.224213
		28	.148500*	0.0362359	6.51775e-05	0.0769541	0.220046
		29	.129167*	0.0362359	0.000476851	0.0576208	0.200713
		30	0.0193333	0.0362359	0.594377	-0.0522125	0.0908792
		31	0.000666667	0.0362359	0.985344	-0.0708792	0.0722125
		32	.082000*	0.0362359	0.0249428	0.0104541	0.153546
		33	.088667*	0.0362359	0.0154569	0.0171208	0.160213
	18	1	0.0361667	0.0362359	0.319698	-0.0353792	0.107713
		2	-0.0268333	0.0362359	0.460039	-0.0983792	0.0447125
		3	-0.046	0.0362359	0.206065	-0.117546	0.0255459
		4	-.087333*	0.0362359	0.0170463	-0.158879	-0.0157875
		5	-.098667*	0.0362359	0.00716731	-0.170213	-0.0271208
		6	0.00716667	0.0362359	0.843462	-0.0643792	0.0787125
		7	-0.0601667	0.0362359	0.0987302	-0.131713	0.0113792
		8	-.106167*	0.0362359	0.00387154	-0.177713	-0.0346208
		9	-.079000*	0.0362359	0.0306624	-0.150546	-0.00745413
		10	-.189000*	0.0362359	5.4253e-07	-0.260546	-0.117454
		11	-0.0385	0.0362359	0.28957	-0.110046	0.0330459
		12	-.096167*	0.0362359	0.00873495	-0.167713	-0.0246208
		13	-0.0683333	0.0362359	0.0610807	-0.139879	0.00321253
		14	-.109000*	0.0362359	0.0030413	-0.180546	-0.0374541
		15	-.150000*	0.0362359	5.53859e-05	-0.221546	-0.0784541
		16	-0.0228333	0.0362359	0.529481	-0.0943792	0.0487125
		17	-.192500*	0.0362359	3.45958e-07	-0.264046	-0.120954
		19	-0.0528333	0.0362359	0.146731	-0.124379	0.0187125
		20	-.090667*	0.0362359	0.0133191	-0.162213	-0.0191208
		21	-.081167*	0.0362359	0.0264297	-0.152713	-0.0096208
		22	-0.0475	0.0362359	0.191729	-0.119046	0.0240459
		23	-.131333*	0.0362359	0.000385432	-0.202879	-0.0597875
		24	-0.0178333	0.0362359	0.623271	-0.0893792	0.0537125
		25	-0.0325	0.0362359	0.371079	-0.104046	0.0390459
		26	-0.0511667	0.0362359	0.159821	-0.122713	0.0203792
		27	-0.0398333	0.0362359	0.273248	-0.111379	0.0317125
		28	-0.044	0.0362359	0.226382	-0.115546	0.0275459
		29	-0.0633333	0.0362359	0.082358	-0.134879	0.00821253
		30	-.173167*	0.0362359	3.87586e-06	-0.244713	-0.101621
		31	-.191833*	0.0362359	3.77071e-07	-0.263379	-0.120287
		32	-.110500*	0.0362359	0.00267135	-0.182046	-0.0389541
		33	-.103833*	0.0362359	0.00470608	-0.175379	-0.0322875
	19	1	.089000*	0.0362359	0.0150807	0.0174541	0.160546
		2	0.026	0.0362359	0.474068	-0.0455459	0.0975459
		3	0.00683333	0.0362359	0.850655	-0.0647125	0.0783792
		4	-0.0345	0.0362359	0.342442	-0.106046	0.0370459
		5	-0.0458333	0.0362359	0.207705	-0.117379	0.0257125
		6	0.06	0.0362359	0.0996599	-0.0115459	0.131546
		7	-0.00733333	0.0362359	0.839871	-0.0788792	0.0642125
		8	-0.0533333	0.0362359	0.14297	-0.124879	0.0182125
		9	-0.0261667	0.0362359	0.471243	-0.0977125	0.0453792
		10	-.136167*	0.0362359	0.000237503	-0.207713	-0.0646208
		11	0.0143333	0.0362359	0.692944	-0.0572125	0.0858792
		12	-0.0433333	0.0362359	0.233464	-0.114879	0.0282125
		13	-0.0155	0.0362359	0.669389	-0.0870459	0.0560459
		14	-0.0561667	0.0362359	0.123051	-0.127713	0.0153792
		15	-.097167*	0.0362359	0.00807412	-0.168713	-0.0256208
		16	0.03	0.0362359	0.408919	-0.0415459	0.101546
		17	-.139667*	0.0362359	0.000165929	-0.211213	-0.0681208
		18	0.0528333	0.0362359	0.146731	-0.0187125	0.124379
		20	-0.0378333	0.0362359	0.297974	-0.109379	0.0337125
		21	-0.0283333	0.0362359	0.435386	-0.0998792	0.0432125
		22	0.00533333	0.0362359	0.883167	-0.0662125	0.0768792
		23	-.078500*	0.0362359	0.0317187	-0.150046	-0.00695413
		24	0.035	0.0362359	0.335512	-0.0365459	0.106546
		25	0.0203333	0.0362359	0.575465	-0.0512125	0.0918792
		26	0.00166667	0.0362359	0.96337	-0.0698792	0.0732125
		27	0.013	0.0362359	0.720233	-0.0585459	0.0845459
		28	0.00883333	0.0362359	0.80771	-0.0627125	0.0803792
		29	-0.0105	0.0362359	0.772358	-0.0820459	0.0610459
		30	-.120333*	0.0362359	0.00110495	-0.191879	-0.0487875
		31	-.139000*	0.0362359	0.000177751	-0.210546	-0.0674541
		32	-0.0576667	0.0362359	0.113429	-0.129213	0.0138792
		33	-0.051	0.0362359	0.161177	-0.122546	0.0205459
	20	1	.126833*	0.0362359	0.00059793	0.0552875	0.198379
		2	0.0638333	0.0362359	0.0799884	-0.00771253	0.135379
		3	0.0446667	0.0362359	0.219455	-0.0268792	0.116213
		4	0.00333333	0.0362359	0.926818	-0.0682125	0.0748792
		5	-0.008	0.0362359	0.82554	-0.0795459	0.0635459
		6	.097833*	0.0362359	0.00765901	0.0262875	0.169379
		7	0.0305	0.0362359	0.401171	-0.0410459	0.102046
		8	-0.0155	0.0362359	0.669389	-0.0870459	0.0560459
		9	0.0116667	0.0362359	0.747887	-0.0598792	0.0832125
		10	-.098333*	0.0362359	0.00736046	-0.169879	-0.0267875
		11	0.0521667	0.0362359	0.151864	-0.0193792	0.123713
		12	-0.0055	0.0362359	0.879543	-0.0770459	0.0660459
		13	0.0223333	0.0362359	0.538525	-0.0492125	0.0938792
		14	-0.0183333	0.0362359	0.613572	-0.0898792	0.0532125
		15	-0.0593333	0.0362359	0.103449	-0.130879	0.0122125
		16	0.0678333	0.0362359	0.0629776	-0.00371253	0.139379
		17	-.101833*	0.0362359	0.00554886	-0.173379	-0.0302875
		18	.090667*	0.0362359	0.0133191	0.0191208	0.162213
		19	0.0378333	0.0362359	0.297974	-0.0337125	0.109379
		21	0.0095	0.0362359	0.793517	-0.0620459	0.0810459
		22	0.0431667	0.0362359	0.23526	-0.0283792	0.114713
		23	-0.0406667	0.0362359	0.263376	-0.112213	0.0308792
		24	.072833*	0.0362359	0.0460632	0.00128747	0.144379
		25	0.0581667	0.0362359	0.110357	-0.0133792	0.129713
		26	0.0395	0.0362359	0.277268	-0.0320459	0.111046
		27	0.0508333	0.0362359	0.162542	-0.0207125	0.122379
		28	0.0466667	0.0362359	0.199599	-0.0248792	0.118213
		29	0.0273333	0.0362359	0.451735	-0.0442125	0.0988792
		30	-.082500*	0.0362359	0.0240862	-0.154046	-0.0109541
		31	-.101167*	0.0362359	0.00585897	-0.172713	-0.0296208
		32	-0.0198333	0.0362359	0.584885	-0.0913792	0.0517125
		33	-0.0131667	0.0362359	0.716801	-0.0847125	0.0583792
	21	1	.117333*	0.0362359	0.00145509	0.0457875	0.188879
		2	0.0543333	0.0362359	0.135672	-0.0172125	0.125879
		3	0.0351667	0.0362359	0.333222	-0.0363792	0.106713
		4	-0.00616667	0.0362359	0.865076	-0.0777125	0.0653792
		5	-0.0175	0.0362359	0.629774	-0.0890459	0.0540459
		6	.088333*	0.0362359	0.0158414	0.0167875	0.159879
		7	0.021	0.0362359	0.563018	-0.0505459	0.0925459
		8	-0.025	0.0362359	0.491212	-0.0965459	0.0465459
		9	0.00216667	0.0362359	0.952393	-0.0693792	0.0737125
		10	-.107833*	0.0362359	0.00336103	-0.179379	-0.0362875
		11	0.0426667	0.0362359	0.240704	-0.0288792	0.114213
		12	-0.015	0.0362359	0.679446	-0.0865459	0.0565459
		13	0.0128333	0.0362359	0.723671	-0.0587125	0.0843792
		14	-0.0278333	0.0362359	0.443517	-0.0993792	0.0437125
		15	-0.0688333	0.0362359	0.0592319	-0.140379	0.00271253
		16	0.0583333	0.0362359	0.109349	-0.0132125	0.129879
		17	-.111333*	0.0362359	0.00248422	-0.182879	-0.0397875
		18	.081167*	0.0362359	0.0264297	0.0096208	0.152713
		19	0.0283333	0.0362359	0.435386	-0.0432125	0.0998792
		20	-0.0095	0.0362359	0.793517	-0.0810459	0.0620459
		22	0.0336667	0.0362359	0.354196	-0.0378792	0.105213
		23	-0.0501667	0.0362359	0.168092	-0.121713	0.0213792
		24	0.0633333	0.0362359	0.082358	-0.00821253	0.134879
		25	0.0486667	0.0362359	0.1811	-0.0228792	0.120213
		26	0.03	0.0362359	0.408919	-0.0415459	0.101546
		27	0.0413333	0.0362359	0.255659	-0.0302125	0.112879
		28	0.0371667	0.0362359	0.306541	-0.0343792	0.108713
		29	0.0178333	0.0362359	0.623271	-0.0537125	0.0893792
		30	-.092000*	0.0362359	0.0120446	-0.163546	-0.0204541
		31	-.110667*	0.0362359	0.00263291	-0.182213	-0.0391208
		32	-0.0293333	0.0362359	0.419388	-0.100879	0.0422125
		33	-0.0226667	0.0362359	0.532487	-0.0942125	0.0488792
	22	1	.083667*	0.0362359	0.0221869	0.0121208	0.155213
		2	0.0206667	0.0362359	0.569225	-0.0508792	0.0922125
		3	0.0015	0.0362359	0.967031	-0.0700459	0.0730459
		4	-0.0398333	0.0362359	0.273248	-0.111379	0.0317125
		5	-0.0511667	0.0362359	0.159821	-0.122713	0.0203792
		6	0.0546667	0.0362359	0.133305	-0.0168792	0.126213
		7	-0.0126667	0.0362359	0.727114	-0.0842125	0.0588792
		8	-0.0586667	0.0362359	0.107353	-0.130213	0.0128792
		9	-0.0315	0.0362359	0.385944	-0.103046	0.0400459
		10	-.141500*	0.0362359	0.000137147	-0.213046	-0.0699541
		11	0.009	0.0362359	0.804155	-0.0625459	0.0805459
		12	-0.0486667	0.0362359	0.1811	-0.120213	0.0228792
		13	-0.0208333	0.0362359	0.566118	-0.0923792	0.0507125
		14	-0.0615	0.0362359	0.0915423	-0.133046	0.0100459
		15	-.102500*	0.0362359	0.00525377	-0.174046	-0.0309541
		16	0.0246667	0.0362359	0.497	-0.0468792	0.0962125
		17	-.145000*	0.0362359	9.48546e-05	-0.216546	-0.0734541
		18	0.0475	0.0362359	0.191729	-0.0240459	0.119046
		19	-0.00533333	0.0362359	0.883167	-0.0768792	0.0662125
		20	-0.0431667	0.0362359	0.23526	-0.114713	0.0283792
		21	-0.0336667	0.0362359	0.354196	-0.105213	0.0378792
		23	-.083833*	0.0362359	0.0219266	-0.155379	-0.0122875
		24	0.0296667	0.0362359	0.414134	-0.0418792	0.101213
		25	0.015	0.0362359	0.679446	-0.0565459	0.0865459
		26	-0.00366667	0.0362359	0.919524	-0.0752125	0.0678792
		27	0.00766667	0.0362359	0.832699	-0.0638792	0.0792125
		28	0.0035	0.0362359	0.92317	-0.0680459	0.0750459
		29	-0.0158333	0.0362359	0.662718	-0.0873792	0.0557125
		30	-.125667*	0.0362359	0.000668783	-0.197213	-0.0541208
		31	-.144333*	0.0362359	0.000101807	-0.215879	-0.0727875
		32	-0.063	0.0362359	0.0839694	-0.134546	0.00854587
		33	-0.0563333	0.0362359	0.121951	-0.127879	0.0152125
	23	1	.167500*	0.0362359	7.61338e-06	0.0959541	0.239046
		2	.104500*	0.0362359	0.00445227	0.0329541	0.176046
		3	.085333*	0.0362359	0.019702	0.0137875	0.156879
		4	0.044	0.0362359	0.226382	-0.0275459	0.115546
		5	0.0326667	0.0362359	0.368637	-0.0388792	0.104213
		6	.138500*	0.0362359	0.000187137	0.0669541	0.210046
		7	0.0711667	0.0362359	0.0512124	-0.000379202	0.142713
		8	0.0251667	0.0362359	0.488331	-0.0463792	0.0967125
		9	0.0523333	0.0362359	0.150568	-0.0192125	0.123879
		10	-0.0576667	0.0362359	0.113429	-0.129213	0.0138792
		11	.092833*	0.0362359	0.0113045	0.0212875	0.164379
		12	0.0351667	0.0362359	0.333222	-0.0363792	0.106713
		13	0.063	0.0362359	0.0839694	-0.00854587	0.134546
		14	0.0223333	0.0362359	0.538525	-0.0492125	0.0938792
		15	-0.0186667	0.0362359	0.607143	-0.0902125	0.0528792
		16	.108500*	0.0362359	0.00317473	0.0369541	0.180046
		17	-0.0611667	0.0362359	0.0932982	-0.132713	0.0103792
		18	.131333*	0.0362359	0.000385432	0.0597875	0.202879
		19	.078500*	0.0362359	0.0317187	0.00695413	0.150046
		20	0.0406667	0.0362359	0.263376	-0.0308792	0.112213
		21	0.0501667	0.0362359	0.168092	-0.0213792	0.121713
		22	.083833*	0.0362359	0.0219266	0.0122875	0.155379
		24	.113500*	0.0362359	0.00205284	0.0419541	0.185046
		25	.098833*	0.0362359	0.00707247	0.0272875	0.170379
		26	.080167*	0.0362359	0.0283154	0.0086208	0.151713
		27	.091500*	0.0362359	0.0125091	0.0199541	0.163046
		28	.087333*	0.0362359	0.0170463	0.0157875	0.158879
		29	0.068	0.0362359	0.0623399	-0.00354587	0.139546
		30	-0.0418333	0.0362359	0.249976	-0.113379	0.0297125
		31	-0.0605	0.0362359	0.0968919	-0.132046	0.0110459
		32	0.0208333	0.0362359	0.566118	-0.0507125	0.0923792
		33	0.0275	0.0362359	0.448986	-0.0440459	0.0990459
	24	1	0.054	0.0362359	0.138072	-0.0175459	0.125546
		2	-0.009	0.0362359	0.804155	-0.0805459	0.0625459
		3	-0.0281667	0.0362359	0.438087	-0.0997125	0.0433792
		4	-0.0695	0.0362359	0.0568399	-0.141046	0.00204587
		5	-.080833*	0.0362359	0.0270457	-0.152379	-0.00928747
		6	0.025	0.0362359	0.491212	-0.0465459	0.0965459
		7	-0.0423333	0.0362359	0.244383	-0.113879	0.0292125
		8	-.088333*	0.0362359	0.0158414	-0.159879	-0.0167875
		9	-0.0611667	0.0362359	0.0932982	-0.132713	0.0103792
		10	-.171167*	0.0362359	4.92744e-06	-0.242713	-0.0996208
		11	-0.0206667	0.0362359	0.569225	-0.0922125	0.0508792
		12	-.078333*	0.0362359	0.0320778	-0.149879	-0.00678747
		13	-0.0505	0.0362359	0.165299	-0.122046	0.0210459
		14	-.091167*	0.0362359	0.0128277	-0.162713	-0.0196208
		15	-.132167*	0.0362359	0.000354889	-0.203713	-0.0606208
		16	-0.005	0.0362359	0.890421	-0.0765459	0.0665459
		17	-.174667*	0.0362359	3.23322e-06	-0.246213	-0.103121
		18	0.0178333	0.0362359	0.623271	-0.0537125	0.0893792
		19	-0.035	0.0362359	0.335512	-0.106546	0.0365459
		20	-.072833*	0.0362359	0.0460632	-0.144379	-0.00128747
		21	-0.0633333	0.0362359	0.082358	-0.134879	0.00821253
		22	-0.0296667	0.0362359	0.414134	-0.101213	0.0418792
		23	-.113500*	0.0362359	0.00205284	-0.185046	-0.0419541
		25	-0.0146667	0.0362359	0.686182	-0.0862125	0.0568792
		26	-0.0333333	0.0362359	0.358969	-0.104879	0.0382125
		27	-0.022	0.0362359	0.544598	-0.0935459	0.0495459
		28	-0.0261667	0.0362359	0.471243	-0.0977125	0.0453792
		29	-0.0455	0.0362359	0.211015	-0.117046	0.0260459
		30	-.155333*	0.0362359	3.07545e-05	-0.226879	-0.0837875
		31	-.174000*	0.0362359	3.50498e-06	-0.245546	-0.102454
		32	-.092667*	0.0362359	0.0114491	-0.164213	-0.0211208
		33	-.086000*	0.0362359	0.0187788	-0.157546	-0.0144541
	25	1	0.0686667	0.0362359	0.0598429	-0.0028792	0.140213
		2	0.00566667	0.0362359	0.875923	-0.0658792	0.0772125
		3	-0.0135	0.0362359	0.709955	-0.0850459	0.0580459
		4	-0.0548333	0.0362359	0.132134	-0.126379	0.0167125
		5	-0.0661667	0.0362359	0.0696585	-0.137713	0.0053792
		6	0.0396667	0.0362359	0.275253	-0.0318792	0.111213
		7	-0.0276667	0.0362359	0.446247	-0.0992125	0.0438792
		8	-.073667*	0.0362359	0.043658	-0.145213	-0.0021208
		9	-0.0465	0.0362359	0.201202	-0.118046	0.0250459
		10	-.156500*	0.0362359	2.6988e-05	-0.228046	-0.0849541
		11	-0.006	0.0362359	0.868689	-0.0775459	0.0655459
		12	-0.0636667	0.0362359	0.080772	-0.135213	0.0078792
		13	-0.0358333	0.0362359	0.324165	-0.107379	0.0357125
		14	-.076500*	0.0362359	0.0362649	-0.148046	-0.00495413
		15	-.117500*	0.0362359	0.0014332	-0.189046	-0.0459541
		16	0.00966667	0.0362359	0.789979	-0.0618792	0.0812125
		17	-.160000*	0.0362359	1.81616e-05	-0.231546	-0.0884541
		18	0.0325	0.0362359	0.371079	-0.0390459	0.104046
		19	-0.0203333	0.0362359	0.575465	-0.0918792	0.0512125
		20	-0.0581667	0.0362359	0.110357	-0.129713	0.0133792
		21	-0.0486667	0.0362359	0.1811	-0.120213	0.0228792
		22	-0.015	0.0362359	0.679446	-0.0865459	0.0565459
		23	-.098833*	0.0362359	0.00707247	-0.170379	-0.0272875
		24	0.0146667	0.0362359	0.686182	-0.0568792	0.0862125
		26	-0.0186667	0.0362359	0.607143	-0.0902125	0.0528792
		27	-0.00733333	0.0362359	0.839871	-0.0788792	0.0642125
		28	-0.0115	0.0362359	0.751368	-0.0830459	0.0600459
		29	-0.0308333	0.0362359	0.396055	-0.102379	0.0407125
		30	-.140667*	0.0362359	0.000149586	-0.212213	-0.0691208
		31	-.159333*	0.0362359	1.95942e-05	-0.230879	-0.0877875
		32	-.078000*	0.0362359	0.0328064	-0.149546	-0.00645413
		33	-0.0713333	0.0362359	0.0506765	-0.142879	0.000212535
	26	1	.087333*	0.0362359	0.0170463	0.0157875	0.158879
		2	0.0243333	0.0362359	0.502825	-0.0472125	0.0958792
		3	0.00516667	0.0362359	0.886793	-0.0663792	0.0767125
		4	-0.0361667	0.0362359	0.319698	-0.107713	0.0353792
		5	-0.0475	0.0362359	0.191729	-0.119046	0.0240459
		6	0.0583333	0.0362359	0.109349	-0.0132125	0.129879
		7	-0.009	0.0362359	0.804155	-0.0805459	0.0625459
		8	-0.055	0.0362359	0.130971	-0.126546	0.0165459
		9	-0.0278333	0.0362359	0.443517	-0.0993792	0.0437125
		10	-.137833*	0.0362359	0.000200385	-0.209379	-0.0662875
		11	0.0126667	0.0362359	0.727114	-0.0588792	0.0842125
		12	-0.045	0.0362359	0.21605	-0.116546	0.0265459
		13	-0.0171667	0.0362359	0.636306	-0.0887125	0.0543792
		14	-0.0578333	0.0362359	0.112397	-0.129379	0.0137125
		15	-.098833*	0.0362359	0.00707247	-0.170379	-0.0272875
		16	0.0283333	0.0362359	0.435386	-0.0432125	0.0998792
		17	-.141333*	0.0362359	0.000139553	-0.212879	-0.0697875
		18	0.0511667	0.0362359	0.159821	-0.0203792	0.122713
		19	-0.00166667	0.0362359	0.96337	-0.0732125	0.0698792
		20	-0.0395	0.0362359	0.277268	-0.111046	0.0320459
		21	-0.03	0.0362359	0.408919	-0.101546	0.0415459
		22	0.00366667	0.0362359	0.919524	-0.0678792	0.0752125
		23	-.080167*	0.0362359	0.0283154	-0.151713	-0.0086208
		24	0.0333333	0.0362359	0.358969	-0.0382125	0.104879
		25	0.0186667	0.0362359	0.607143	-0.0528792	0.0902125
		27	0.0113333	0.0362359	0.754854	-0.0602125	0.0828792
		28	0.00716667	0.0362359	0.843462	-0.0643792	0.0787125
		29	-0.0121667	0.0362359	0.737477	-0.0837125	0.0593792
		30	-.122000*	0.0362359	0.000946141	-0.193546	-0.0504541
		31	-.140667*	0.0362359	0.000149586	-0.212213	-0.0691208
		32	-0.0593333	0.0362359	0.103449	-0.130879	0.0122125
		33	-0.0526667	0.0362359	0.148002	-0.124213	0.0188792
	27	1	.076000*	0.0362359	0.0374854	0.00445413	0.147546
		2	0.013	0.0362359	0.720233	-0.0585459	0.0845459
		3	-0.00616667	0.0362359	0.865076	-0.0777125	0.0653792
		4	-0.0475	0.0362359	0.191729	-0.119046	0.0240459
		5	-0.0588333	0.0362359	0.106366	-0.130379	0.0127125
		6	0.047	0.0362359	0.196423	-0.0245459	0.118546
		7	-0.0203333	0.0362359	0.575465	-0.0918792	0.0512125
		8	-0.0663333	0.0362359	0.068965	-0.137879	0.00521253
		9	-0.0391667	0.0362359	0.281328	-0.110713	0.0323792
		10	-.149167*	0.0362359	6.06373e-05	-0.220713	-0.0776208
		11	0.00133333	0.0362359	0.970692	-0.0702125	0.0728792
		12	-0.0563333	0.0362359	0.121951	-0.127879	0.0152125
		13	-0.0285	0.0362359	0.432696	-0.100046	0.0430459
		14	-0.0691667	0.0362359	0.0580255	-0.140713	0.0023792
		15	-.110167*	0.0362359	0.00274978	-0.181713	-0.0386208
		16	0.017	0.0362359	0.639583	-0.0545459	0.0885459
		17	-.152667*	0.0362359	4.13479e-05	-0.224213	-0.0811208
		18	0.0398333	0.0362359	0.273248	-0.0317125	0.111379
		19	-0.013	0.0362359	0.720233	-0.0845459	0.0585459
		20	-0.0508333	0.0362359	0.162542	-0.122379	0.0207125
		21	-0.0413333	0.0362359	0.255659	-0.112879	0.0302125
		22	-0.00766667	0.0362359	0.832699	-0.0792125	0.0638792
		23	-.091500*	0.0362359	0.0125091	-0.163046	-0.0199541
		24	0.022	0.0362359	0.544598	-0.0495459	0.0935459
		25	0.00733333	0.0362359	0.839871	-0.0642125	0.0788792
		26	-0.0113333	0.0362359	0.754854	-0.0828792	0.0602125
		28	-0.00416667	0.0362359	0.908595	-0.0757125	0.0673792
		29	-0.0235	0.0362359	0.517545	-0.0950459	0.0480459
		30	-.133333*	0.0362359	0.000315948	-0.204879	-0.0617875
		31	-.152000*	0.0362359	4.4498e-05	-0.223546	-0.0804541
		32	-0.0706667	0.0362359	0.052849	-0.142213	0.000879202
		33	-0.064	0.0362359	0.0792111	-0.135546	0.00754587
	28	1	.080167*	0.0362359	0.0283154	0.0086208	0.151713
		2	0.0171667	0.0362359	0.636306	-0.0543792	0.0887125
		3	-0.002	0.0362359	0.956051	-0.0735459	0.0695459
		4	-0.0433333	0.0362359	0.233464	-0.114879	0.0282125
		5	-0.0546667	0.0362359	0.133305	-0.126213	0.0168792
		6	0.0511667	0.0362359	0.159821	-0.0203792	0.122713
		7	-0.0161667	0.0362359	0.656074	-0.0877125	0.0553792
		8	-0.0621667	0.0362359	0.0881108	-0.133713	0.0093792
		9	-0.035	0.0362359	0.335512	-0.106546	0.0365459
		10	-.145000*	0.0362359	9.48546e-05	-0.216546	-0.0734541
		11	0.0055	0.0362359	0.879543	-0.0660459	0.0770459
		12	-0.0521667	0.0362359	0.151864	-0.123713	0.0193792
		13	-0.0243333	0.0362359	0.502825	-0.0958792	0.0472125
		14	-0.065	0.0362359	0.0746763	-0.136546	0.00654587
		15	-.106000*	0.0362359	0.00392632	-0.177546	-0.0344541
		16	0.0211667	0.0362359	0.559927	-0.0503792	0.0927125
		17	-.148500*	0.0362359	6.51775e-05	-0.220046	-0.0769541
		18	0.044	0.0362359	0.226382	-0.0275459	0.115546
		19	-0.00883333	0.0362359	0.80771	-0.0803792	0.0627125
		20	-0.0466667	0.0362359	0.199599	-0.118213	0.0248792
		21	-0.0371667	0.0362359	0.306541	-0.108713	0.0343792
		22	-0.0035	0.0362359	0.92317	-0.0750459	0.0680459
		23	-.087333*	0.0362359	0.0170463	-0.158879	-0.0157875
		24	0.0261667	0.0362359	0.471243	-0.0453792	0.0977125
		25	0.0115	0.0362359	0.751368	-0.0600459	0.0830459
		26	-0.00716667	0.0362359	0.843462	-0.0787125	0.0643792
		27	0.00416667	0.0362359	0.908595	-0.0673792	0.0757125
		29	-0.0193333	0.0362359	0.594377	-0.0908792	0.0522125
		30	-.129167*	0.0362359	0.000476851	-0.200713	-0.0576208
		31	-.147833*	0.0362359	7.00414e-05	-0.219379	-0.0762875
		32	-0.0665	0.0362359	0.0682772	-0.138046	0.00504587
		33	-0.0598333	0.0362359	0.100597	-0.131379	0.0117125
	29	1	.099500*	0.0362359	0.00670438	0.0279541	0.171046
		2	0.0365	0.0362359	0.315271	-0.0350459	0.108046
		3	0.0173333	0.0362359	0.633037	-0.0542125	0.0888792
		4	-0.024	0.0362359	0.508686	-0.0955459	0.0475459
		5	-0.0353333	0.0362359	0.330942	-0.106879	0.0362125
		6	0.0705	0.0362359	0.0534043	-0.00104587	0.142046
		7	0.00316667	0.0362359	0.930467	-0.0683792	0.0747125
		8	-0.0428333	0.0362359	0.238879	-0.114379	0.0287125
		9	-0.0156667	0.0362359	0.66605	-0.0872125	0.0558792
		10	-.125667*	0.0362359	0.000668783	-0.197213	-0.0541208
		11	0.0248333	0.0362359	0.494101	-0.0467125	0.0963792
		12	-0.0328333	0.0362359	0.366205	-0.104379	0.0387125
		13	-0.005	0.0362359	0.890421	-0.0765459	0.0665459
		14	-0.0456667	0.0362359	0.209355	-0.117213	0.0258792
		15	-.086667*	0.0362359	0.017894	-0.158213	-0.0151208
		16	0.0405	0.0362359	0.26533	-0.0310459	0.112046
		17	-.129167*	0.0362359	0.000476851	-0.200713	-0.0576208
		18	0.0633333	0.0362359	0.082358	-0.00821253	0.134879
		19	0.0105	0.0362359	0.772358	-0.0610459	0.0820459
		20	-0.0273333	0.0362359	0.451735	-0.0988792	0.0442125
		21	-0.0178333	0.0362359	0.623271	-0.0893792	0.0537125
		22	0.0158333	0.0362359	0.662718	-0.0557125	0.0873792
		23	-0.068	0.0362359	0.0623399	-0.139546	0.00354587
		24	0.0455	0.0362359	0.211015	-0.0260459	0.117046
		25	0.0308333	0.0362359	0.396055	-0.0407125	0.102379
		26	0.0121667	0.0362359	0.737477	-0.0593792	0.0837125
		27	0.0235	0.0362359	0.517545	-0.0480459	0.0950459
		28	0.0193333	0.0362359	0.594377	-0.0522125	0.0908792
		30	-.109833*	0.0362359	0.00283033	-0.181379	-0.0382875
		31	-.128500*	0.0362359	0.000508855	-0.200046	-0.0569541
		32	-0.0471667	0.0362359	0.194849	-0.118713	0.0243792
		33	-0.0405	0.0362359	0.26533	-0.112046	0.0310459
	30	1	.209333*	0.0362359	3.69511e-08	0.137787	0.280879
		2	.146333*	0.0362359	8.2283e-05	0.0747875	0.217879
		3	.127167*	0.0362359	0.00057902	0.0556208	0.198713
		4	.085833*	0.0362359	0.0190059	0.0142875	0.157379
		5	.074500*	0.0362359	0.0413607	0.00295413	0.146046
		6	.180333*	0.0362359	1.61455e-06	0.108787	0.251879
		7	.113000*	0.0362359	0.00214573	0.0414541	0.184546
		8	0.067	0.0362359	0.066248	-0.00454587	0.138546
		9	.094167*	0.0362359	0.0102048	0.0226208	0.165713
		10	-0.0158333	0.0362359	0.662718	-0.0873792	0.0557125
		11	.134667*	0.0362359	0.000276393	0.0631208	0.206213
		12	.077000*	0.0362359	0.0350788	0.00545413	0.148546
		13	.104833*	0.0362359	0.00433011	0.0332875	0.176379
		14	0.0641667	0.0362359	0.07844	-0.0073792	0.135713
		15	0.0231667	0.0362359	0.523496	-0.0483792	0.0947125
		16	.150333*	0.0362359	5.34096e-05	0.0787875	0.221879
		17	-0.0193333	0.0362359	0.594377	-0.0908792	0.0522125
		18	.173167*	0.0362359	3.87586e-06	0.101621	0.244713
		19	.120333*	0.0362359	0.00110495	0.0487875	0.191879
		20	.082500*	0.0362359	0.0240862	0.0109541	0.154046
		21	.092000*	0.0362359	0.0120446	0.0204541	0.163546
		22	.125667*	0.0362359	0.000668783	0.0541208	0.197213
		23	0.0418333	0.0362359	0.249976	-0.0297125	0.113379
		24	.155333*	0.0362359	3.07545e-05	0.0837875	0.226879
		25	.140667*	0.0362359	0.000149586	0.0691208	0.212213
		26	.122000*	0.0362359	0.000946141	0.0504541	0.193546
		27	.133333*	0.0362359	0.000315948	0.0617875	0.204879
		28	.129167*	0.0362359	0.000476851	0.0576208	0.200713
		29	.109833*	0.0362359	0.00283033	0.0382875	0.181379
		31	-0.0186667	0.0362359	0.607143	-0.0902125	0.0528792
		32	0.0626667	0.0362359	0.0856065	-0.0088792	0.134213
		33	0.0693333	0.0362359	0.0574301	-0.00221253	0.140879
	31	1	.228000*	0.0362359	2.7122e-09	0.156454	0.299546
		2	.165000*	0.0362359	1.02042e-05	0.0934541	0.236546
		3	.145833*	0.0362359	8.67988e-05	0.0742875	0.217379
		4	.104500*	0.0362359	0.00445227	0.0329541	0.176046
		5	.093167*	0.0362359	0.01102	0.0216208	0.164713
		6	.199000*	0.0362359	1.4792e-07	0.127454	0.270546
		7	.131667*	0.0362359	0.000372928	0.0601208	0.203213
		8	.085667*	0.0362359	0.0192355	0.0141208	0.157213
		9	.112833*	0.0362359	0.00217755	0.0412875	0.184379
		10	0.00283333	0.0362359	0.937771	-0.0687125	0.0743792
		11	.153333*	0.0362359	3.84119e-05	0.0817875	0.224879
		12	.095667*	0.0362359	0.00908333	0.0241208	0.167213
		13	.123500*	0.0362359	0.000821711	0.0519541	0.195046
		14	.082833*	0.0362359	0.0235296	0.0112875	0.154379
		15	0.0418333	0.0362359	0.249976	-0.0297125	0.113379
		16	.169000*	0.0362359	6.37704e-06	0.0974541	0.240546
		17	-0.000666667	0.0362359	0.985344	-0.0722125	0.0708792
		18	.191833*	0.0362359	3.77071e-07	0.120287	0.263379
		19	.139000*	0.0362359	0.000177751	0.0674541	0.210546
		20	.101167*	0.0362359	0.00585897	0.0296208	0.172713
		21	.110667*	0.0362359	0.00263291	0.0391208	0.182213
		22	.144333*	0.0362359	0.000101807	0.0727875	0.215879
		23	0.0605	0.0362359	0.0968919	-0.0110459	0.132046
		24	.174000*	0.0362359	3.50498e-06	0.102454	0.245546
		25	.159333*	0.0362359	1.95942e-05	0.0877875	0.230879
		26	.140667*	0.0362359	0.000149586	0.0691208	0.212213
		27	.152000*	0.0362359	4.4498e-05	0.0804541	0.223546
		28	.147833*	0.0362359	7.00414e-05	0.0762875	0.219379
		29	.128500*	0.0362359	0.000508855	0.0569541	0.200046
		30	0.0186667	0.0362359	0.607143	-0.0528792	0.0902125
		32	.081333*	0.0362359	0.0261263	0.00978747	0.152879
		33	.088000*	0.0362359	0.0162343	0.0164541	0.159546
	32	1	.146667*	0.0362359	7.93979e-05	0.0751208	0.218213
		2	.083667*	0.0362359	0.0221869	0.0121208	0.155213
		3	0.0645	0.0362359	0.0769162	-0.00704587	0.136046
		4	0.0231667	0.0362359	0.523496	-0.0483792	0.0947125
		5	0.0118333	0.0362359	0.744412	-0.0597125	0.0833792
		6	.117667*	0.0362359	0.00141162	0.0461208	0.189213
		7	0.0503333	0.0362359	0.166691	-0.0212125	0.121879
		8	0.00433333	0.0362359	0.904956	-0.0672125	0.0758792
		9	0.0315	0.0362359	0.385944	-0.0400459	0.103046
		10	-.078500*	0.0362359	0.0317187	-0.150046	-0.00695413
		11	.072000*	0.0362359	0.04858	0.000454132	0.143546
		12	0.0143333	0.0362359	0.692944	-0.0572125	0.0858792
		13	0.0421667	0.0362359	0.246238	-0.0293792	0.113713
		14	0.0015	0.0362359	0.967031	-0.0700459	0.0730459
		15	-0.0395	0.0362359	0.277268	-0.111046	0.0320459
		16	.087667*	0.0362359	0.0166359	0.0161208	0.159213
		17	-.082000*	0.0362359	0.0249428	-0.153546	-0.0104541
		18	.110500*	0.0362359	0.00267135	0.0389541	0.182046
		19	0.0576667	0.0362359	0.113429	-0.0138792	0.129213
		20	0.0198333	0.0362359	0.584885	-0.0517125	0.0913792
		21	0.0293333	0.0362359	0.419388	-0.0422125	0.100879
		22	0.063	0.0362359	0.0839694	-0.00854587	0.134546
		23	-0.0208333	0.0362359	0.566118	-0.0923792	0.0507125
		24	.092667*	0.0362359	0.0114491	0.0211208	0.164213
		25	.078000*	0.0362359	0.0328064	0.00645413	0.149546
		26	0.0593333	0.0362359	0.103449	-0.0122125	0.130879
		27	0.0706667	0.0362359	0.052849	-0.000879202	0.142213
		28	0.0665	0.0362359	0.0682772	-0.00504587	0.138046
		29	0.0471667	0.0362359	0.194849	-0.0243792	0.118713
		30	-0.0626667	0.0362359	0.0856065	-0.134213	0.0088792
		31	-.081333*	0.0362359	0.0261263	-0.152879	-0.00978747
		33	0.00666667	0.0362359	0.854255	-0.0648792	0.0782125
	33	1	.140000*	0.0362359	0.000160301	0.0684541	0.211546
		2	.077000*	0.0362359	0.0350788	0.00545413	0.148546
		3	0.0578333	0.0362359	0.112397	-0.0137125	0.129379
		4	0.0165	0.0362359	0.649457	-0.0550459	0.0880459
		5	0.00516667	0.0362359	0.886793	-0.0663792	0.0767125
		6	.111000*	0.0362359	0.00255757	0.0394541	0.182546
		7	0.0436667	0.0362359	0.229903	-0.0278792	0.115213
		8	-0.00233333	0.0362359	0.948735	-0.0738792	0.0692125
		9	0.0248333	0.0362359	0.494101	-0.0467125	0.0963792
		10	-.085167*	0.0362359	0.0199389	-0.156713	-0.0136208
		11	0.0653333	0.0362359	0.0732131	-0.00621253	0.136879
		12	0.00766667	0.0362359	0.832699	-0.0638792	0.0792125
		13	0.0355	0.0362359	0.328673	-0.0360459	0.107046
		14	-0.00516667	0.0362359	0.886793	-0.0767125	0.0663792
		15	-0.0461667	0.0362359	0.204435	-0.117713	0.0253792
		16	.081000*	0.0362359	0.0267362	0.00945413	0.152546
		17	-.088667*	0.0362359	0.0154569	-0.160213	-0.0171208
		18	.103833*	0.0362359	0.00470608	0.0322875	0.175379
		19	0.051	0.0362359	0.161177	-0.0205459	0.122546
		20	0.0131667	0.0362359	0.716801	-0.0583792	0.0847125
		21	0.0226667	0.0362359	0.532487	-0.0488792	0.0942125
		22	0.0563333	0.0362359	0.121951	-0.0152125	0.127879
		23	-0.0275	0.0362359	0.448986	-0.0990459	0.0440459
		24	.086000*	0.0362359	0.0187788	0.0144541	0.157546
		25	0.0713333	0.0362359	0.0506765	-0.000212535	0.142879
		26	0.0526667	0.0362359	0.148002	-0.0188792	0.124213
		27	0.064	0.0362359	0.0792111	-0.00754587	0.135546
		28	0.0598333	0.0362359	0.100597	-0.0117125	0.131379
		29	0.0405	0.0362359	0.26533	-0.0310459	0.112046
		30	-0.0693333	0.0362359	0.0574301	-0.140879	0.00221253
		31	-.088000*	0.0362359	0.0162343	-0.159546	-0.0164541
		32	-0.00666667	0.0362359	0.854255	-0.0782125	0.0648792
